# Supplementary material
Source: publisher figshare collection journal article supplement (https://sage.figshare.com/ndownloader/files/21875301)
Supplement: Supplementary file 1 [file 21875301]

## Sheet: Assumptions and results
												Cluster		Business Case Horizon
								WACC	integrated	0.05				8	9	10	11	12	13	14	15	16	17	18	19	20	21	22	23	24
		Years to break even		Profitability gap after 15 years (in million)					wholesale-only	0.04		Urban	1	0	0	0.5	1	1	1	1	1	1	1	1	1	1	1	1	1	1
	Cluster	Integrated	Wholesale-only	Integrated	Wholesale-only			ARPL/ARPU	integrated	45			2	0	0	0	0.5	1	1	1	1	1	1	1	1	1	1	1	1	1
	1	9	8	954.283	1500.57				wholesale-only	35			3	0	0	0	0.5	1	1	1	1	1	1	1	1	1	1	1	1	1
	2	10	9	819.964	1337.77			years to final takeup	integrated	8			4	0	0	0	0.5	0.5	1	1	1	1	1	1	1	1	1	1	1	1
	3	10	9	772.422	1263.78				wholesale-only	7			5	0	0	0	0	0.5	1	1	1	1	1	1	1	1	1	1	1	1
	4	11	9	761.052	1226.79			EBITDA margin	integrated	0.45		Suburban	6	0	0	0	0	0.5	1	1	1	1	1	1	1	1	1	1	1	1
	5	11	10	735.249	1175.01				wholesale-only	0.55			7	0	0	0	0	0.5	0.5	1	1	1	1	1	1	1	1	1	1	1
	6	11	10	680.554	1093.64			OPEX reduction (vert. Eff)	integrated	1.5			8	0	0	0	0	0	0.5	1	1	1	1	1	1	1	1	1	1	1
	7	12	10	647.571	1034.47				wholesale-only	0			9	0	0	0	0	0	0.5	0.5	1	1	1	1	1	1	1	1	1	1
	8	12	11	519.729	878.183			final take up Cluster 1	integrated	0.55			10	0	0	0	0	0	0	0.5	1	1	1	1	1	1	1	1	1	1
	9	13	11	478.659	810.703				wholesale-only	0.65			11	0	0	0	0	0	0	0	0.5	1	1	1	1	1	1	1	1	1
	10	13	12	343.633	647.025			final take up Cluster 20	integrated	0.8			12	0	0	0	0	0	0	0	0.5	1	1	1	1	1	1	1	1	1
	11	14	13	317.065	594.358				wholesale-only	0.8			13	0	0	0	0	0	0	0	0	0.5	1	1	1	1	1	1	1	1
	12	14	13	260.699	511.17								14	0	0	0	0	0	0	0	0	0.5	1	1	1	1	1	1	1	1
	13	15	14	152.845	375.261								15	0	0	0	0	0	0	0	0	0.5	1	1	1	1	1	1	1	1
	14	15	14	67.6031	262.484							Rural	16	0	0	0	0	0	0	0	0	0	0.5	1	1	1	1	1	1	1
	15	15	14	55.5755	224.64								17	0	0	0	0	0	0	0	0	0	0	0.5	1	1	1	1	1	1
	16	16	15	-60.3516	80.4228								18	0	0	0	0	0	0	0	0	0	0	0	0	0	0	0	0.5	1
	17	17	16	-194.333	-82.2896								19	0	0	0	0	0	0	0	0	0	0	0	0	0	0	0	0	0
	18	22	21	-1069.28	-1003.52								20	0	0	0	0	0	0	0	0	0	0	0	0	0	0	0	0	0
	19	33	29	-2184.58	-2170.81
	20	>50	>50	-3901.69	-3954.17

## Sheet: Cost inputs
			Cluster	CAPEX per household	# of households	final takeup int	final takeup wo		WIK original	factor	base Feijoo urban
			1	876	2038700	0.55	0.65		876		656
			2	985	2038700	0.563158	0.657895		985	1.12443	737.626
			3	1046	2038700	0.576316	0.665789		1046	1.06193	783.306
			4	1087	2038700	0.589474	0.673684		1087	1.0392	814.009
			5	1136	2038700	0.602632	0.681579		1136	1.04508	850.703
			6	1201	2038700	0.615789	0.689474		1201	1.05722	899.379
			7	1254	2038700	0.628947	0.697368		1254	1.04413	939.068
			8	1359.5	2038700	0.642105	0.705263		1359.5	1.08413	1018.07
			9	1417	2038700	0.655263	0.713158		1417	1.04229	1061.13
			10	1526.5	2038700	0.668421	0.721053		1526.5	1.07728	1143.13
			11	1576	2038700	0.681579	0.728947		1576	1.03243	1180.2
			12	1642	2038700	0.694737	0.736842		1642	1.04188	1229.63
			13	1736.5	2038700	0.707895	0.744737		1736.5	1.05755	1300.39
			14	1818.5	2038700	0.721053	0.752632		1818.5	1.04722	1361.8
			15	1860	2038700	0.734211	0.760526		1860	1.02282	1392.88
			16	1959	2038700	0.747368	0.768421		1959	1.05323	1467.01
			17	2068	2038700	0.760526	0.776316		2068	1.05564	1548.64
			18	2587	2038700	0.773684	0.784211		2587	1.25097	1937.3
			19	3239	2038700	0.786842	0.792105		3239	1.25203	2425.55
			20	4224	2038700	0.8	0.8		4224	1.30411	3163.18
					urban	656	480	1.36667
					suburban	1388	480	2.89167
					semi-rural	2054	480	4.27917
					rural	2609	480	5.43542
					extremely rural	6711	480	13.9812

## Sheet: upfront investment module
		Cluster	Capex total	Capex year 1	Capex year 2	Capex year 3	Capex year 4	NPV Capex int	NPV Capex wo
		1	1785901200	446475300	446475300	446475300	446475300	1.58318e+09	1.62066e+09
		2	2008119500	502029875	502029875	502029875	502029875	1.78017e+09	1.82232e+09
		3	2132480200	533120050	533120050	533120050	533120050	1.89042e+09	1.93517e+09
		4	2216066900	554016725	554016725	554016725	554016725	1.96452e+09	2.01102e+09
		5	2315963200	578990800	578990800	578990800	578990800	2.05307e+09	2.10168e+09
		6	2448478700	612119675	612119675	612119675	612119675	2.17055e+09	2.22193e+09
		7	2556529800	639132450	639132450	639132450	639132450	2.26633e+09	2.31998e+09
		8	2771612650	6.92903e+08	6.92903e+08	6.92903e+08	6.92903e+08	2.457e+09	2.51517e+09
		9	2888837900	722209475	722209475	722209475	722209475	2.56092e+09	2.62154e+09
		10	3112075550	7.78019e+08	7.78019e+08	7.78019e+08	7.78019e+08	2.75882e+09	2.82413e+09
		11	3212991200	803247800	803247800	803247800	803247800	2.84828e+09	2.91571e+09
		12	3347545400	836886350	836886350	836886350	836886350	2.96756e+09	3.03781e+09
		13	3540202550	8.85051e+08	8.85051e+08	8.85051e+08	8.85051e+08	3.13835e+09	3.21264e+09
		14	3707375950	9.26844e+08	9.26844e+08	9.26844e+08	9.26844e+08	3.28654e+09	3.36435e+09
		15	3791982000	947995500	947995500	947995500	947995500	3.36155e+09	3.44112e+09
		16	3993813300	998453325	998453325	998453325	998453325	3.54047e+09	3.62428e+09
		17	4216031600	1054007900	1054007900	1054007900	1054007900	3.73746e+09	3.82594e+09
		18	5274116900	1318529225	1318529225	1318529225	1318529225	4.67544e+09	4.78612e+09
		19	6603349300	1650837325	1650837325	1650837325	1650837325	5.85379e+09	5.99237e+09
		20	8611468800	2152867200	2152867200	2152867200	2152867200	7.63396e+09	7.81468e+09

## Sheet: Demand model
	integrated
		Cluster	final takeup	growth rate		1	2	3	4	5	6	7	8	9	10	11	12	13	14	15	16	17	18	19	20	21	22	23	24	25	26	27	28	29	30	31	32	33	34	35	36	37	38	39	40	41	42	43	44
		1	0.55	0.58756		0.244375	0.38017	0.455629	0.49756	0.52086	0.533807	0.541002	0.545	0.547222	0.548456	0.549142	0.549523	0.549735	0.549853	0.549918	0.549955	0.549975	0.549986	0.549992	0.549996	0.549998	0.549999	0.549999	0.55	0.55	0.55	0.55	0.55	0.55	0.55	0.55	0.55	0.55	0.55	0.55	0.55	0.55	0.55	0.55	0.55	0.55	0.55	0.55	0.55
		2	0.563158	0.590515		0.251145	0.39029	0.467382	0.510094	0.533758	0.546869	0.554133	0.558158	0.560388	0.561623	0.562308	0.562687	0.562897	0.563013	0.563078	0.563114	0.563133	0.563144	0.56315	0.563154	0.563156	0.563157	0.563157	0.563158	0.563158	0.563158	0.563158	0.563158	0.563158	0.563158	0.563158	0.563158	0.563158	0.563158	0.563158	0.563158	0.563158	0.563158	0.563158	0.563158	0.563158	0.563158	0.563158	0.563158
		3	0.576316	0.593402		0.257933	0.400427	0.479147	0.522635	0.54666	0.559933	0.567265	0.571316	0.573554	0.57479	0.575473	0.57585	0.576059	0.576174	0.576237	0.576272	0.576292	0.576303	0.576308	0.576312	0.576314	0.576315	0.576315	0.576315	0.576316	0.576316	0.576316	0.576316	0.576316	0.576316	0.576316	0.576316	0.576316	0.576316	0.576316	0.576316	0.576316	0.576316	0.576316	0.576316	0.576316	0.576316	0.576316	0.576316
		4	0.589474	0.596224		0.26474	0.410582	0.490924	0.535184	0.559566	0.572998	0.580397	0.584474	0.586719	0.587956	0.588638	0.589013	0.58922	0.589334	0.589397	0.589431	0.58945	0.589461	0.589467	0.58947	0.589472	0.589472	0.589473	0.589473	0.589473	0.589474	0.589474	0.589474	0.589474	0.589474	0.589474	0.589474	0.589474	0.589474	0.589474	0.589474	0.589474	0.589474	0.589474	0.589474	0.589474	0.589474	0.589474	0.589474
		5	0.602632	0.598984		0.271564	0.420753	0.502713	0.547739	0.572475	0.586065	0.59353	0.597632	0.599885	0.601123	0.601803	0.602176	0.602381	0.602494	0.602556	0.60259	0.602609	0.602619	0.602625	0.602628	0.60263	0.60263	0.602631	0.602631	0.602631	0.602631	0.602632	0.602632	0.602632	0.602632	0.602632	0.602632	0.602632	0.602632	0.602632	0.602632	0.602632	0.602632	0.602632	0.602632	0.602632	0.602632	0.602632	0.602632
		6	0.615789	0.601683		0.278405	0.430941	0.514513	0.560301	0.585388	0.599133	0.606664	0.610789	0.61305	0.614289	0.614967	0.615339	0.615543	0.615654	0.615715	0.615749	0.615767	0.615777	0.615783	0.615786	0.615787	0.615788	0.615789	0.615789	0.615789	0.615789	0.615789	0.615789	0.615789	0.615789	0.615789	0.615789	0.615789	0.615789	0.615789	0.615789	0.615789	0.615789	0.615789	0.615789	0.615789	0.615789	0.615789	0.615789
		7	0.628947	0.604326		0.285264	0.441144	0.526324	0.572869	0.598304	0.612203	0.619797	0.623947	0.626215	0.627454	0.628132	0.628502	0.628704	0.628814	0.628875	0.628908	0.628926	0.628935	0.628941	0.628944	0.628945	0.628946	0.628947	0.628947	0.628947	0.628947	0.628947	0.628947	0.628947	0.628947	0.628947	0.628947	0.628947	0.628947	0.628947	0.628947	0.628947	0.628947	0.628947	0.628947	0.628947	0.628947	0.628947	0.628947
		8	0.642105	0.606914		0.292139	0.451363	0.538145	0.585444	0.611223	0.625274	0.632931	0.637105	0.63938	0.64062	0.641296	0.641664	0.641865	0.641974	0.642034	0.642066	0.642084	0.642094	0.642099	0.642102	0.642103	0.642104	0.642105	0.642105	0.642105	0.642105	0.642105	0.642105	0.642105	0.642105	0.642105	0.642105	0.642105	0.642105	0.642105	0.642105	0.642105	0.642105	0.642105	0.642105	0.642105	0.642105	0.642105	0.642105
		9	0.655263	0.60945		0.299029	0.461597	0.549976	0.598024	0.624145	0.638346	0.646066	0.650263	0.652545	0.653785	0.65446	0.654826	0.655026	0.655134	0.655193	0.655225	0.655242	0.655252	0.655257	0.65526	0.655261	0.655262	0.655263	0.655263	0.655263	0.655263	0.655263	0.655263	0.655263	0.655263	0.655263	0.655263	0.655263	0.655263	0.655263	0.655263	0.655263	0.655263	0.655263	0.655263	0.655263	0.655263	0.655263	0.655263
		10	0.668421	0.611935		0.305936	0.471845	0.561818	0.61061	0.63707	0.651419	0.659201	0.663421	0.66571	0.666951	0.667624	0.667989	0.668187	0.668294	0.668352	0.668384	0.668401	0.66841	0.668415	0.668418	0.668419	0.66842	0.668421	0.668421	0.668421	0.668421	0.668421	0.668421	0.668421	0.668421	0.668421	0.668421	0.668421	0.668421	0.668421	0.668421	0.668421	0.668421	0.668421	0.668421	0.668421	0.668421	0.668421	0.668421
		11	0.681579	0.614372		0.312858	0.482108	0.573669	0.623202	0.649998	0.664494	0.672336	0.676579	0.678874	0.680116	0.680787	0.681151	0.681347	0.681454	0.681511	0.681542	0.681559	0.681568	0.681573	0.681576	0.681577	0.681578	0.681578	0.681579	0.681579	0.681579	0.681579	0.681579	0.681579	0.681579	0.681579	0.681579	0.681579	0.681579	0.681579	0.681579	0.681579	0.681579	0.681579	0.681579	0.681579	0.681579	0.681579	0.681579
		12	0.694737	0.616762		0.319795	0.492385	0.58553	0.635799	0.662929	0.67757	0.685472	0.689737	0.692038	0.693281	0.693951	0.694313	0.694508	0.694613	0.69467	0.694701	0.694717	0.694726	0.694731	0.694734	0.694735	0.694736	0.694736	0.694737	0.694737	0.694737	0.694737	0.694737	0.694737	0.694737	0.694737	0.694737	0.694737	0.694737	0.694737	0.694737	0.694737	0.694737	0.694737	0.694737	0.694737	0.694737	0.694737	0.694737
		13	0.707895	0.619107		0.326747	0.502675	0.597399	0.648401	0.675862	0.690647	0.698608	0.702895	0.705203	0.706445	0.707114	0.707475	0.707668	0.707773	0.707829	0.707859	0.707876	0.707884	0.707889	0.707892	0.707893	0.707894	0.707894	0.707894	0.707895	0.707895	0.707895	0.707895	0.707895	0.707895	0.707895	0.707895	0.707895	0.707895	0.707895	0.707895	0.707895	0.707895	0.707895	0.707895	0.707895	0.707895	0.707895	0.707895
		14	0.721053	0.621409		0.333713	0.512979	0.609278	0.661009	0.688798	0.703726	0.711745	0.716053	0.718367	0.71961	0.720278	0.720636	0.720829	0.720932	0.720988	0.721018	0.721034	0.721043	0.721047	0.72105	0.721051	0.721052	0.721052	0.721052	0.721053	0.721053	0.721053	0.721053	0.721053	0.721053	0.721053	0.721053	0.721053	0.721053	0.721053	0.721053	0.721053	0.721053	0.721053	0.721053	0.721053	0.721053	0.721053	0.721053
		15	0.734211	0.62367		0.340693	0.523295	0.621165	0.673621	0.701736	0.716805	0.724882	0.729211	0.731531	0.732774	0.733441	0.733798	0.733989	0.734092	0.734147	0.734176	0.734192	0.734201	0.734205	0.734208	0.734209	0.73421	0.73421	0.73421	0.73421	0.73421	0.73421	0.734211	0.734211	0.734211	0.734211	0.734211	0.734211	0.734211	0.734211	0.734211	0.734211	0.734211	0.734211	0.734211	0.734211	0.734211	0.734211	0.734211
		16	0.747368	0.62589		0.347687	0.533625	0.633061	0.686239	0.714677	0.729886	0.738019	0.742368	0.744694	0.745938	0.746604	0.746959	0.74715	0.747251	0.747306	0.747335	0.747351	0.747359	0.747363	0.747366	0.747367	0.747368	0.747368	0.747368	0.747368	0.747368	0.747368	0.747368	0.747368	0.747368	0.747368	0.747368	0.747368	0.747368	0.747368	0.747368	0.747368	0.747368	0.747368	0.747368	0.747368	0.747368	0.747368	0.747368
		17	0.760526	0.628072		0.354694	0.543966	0.644966	0.698861	0.72762	0.742967	0.751156	0.755526	0.757858	0.759103	0.759767	0.760121	0.76031	0.760411	0.760465	0.760493	0.760509	0.760517	0.760521	0.760524	0.760525	0.760526	0.760526	0.760526	0.760526	0.760526	0.760526	0.760526	0.760526	0.760526	0.760526	0.760526	0.760526	0.760526	0.760526	0.760526	0.760526	0.760526	0.760526	0.760526	0.760526	0.760526	0.760526	0.760526
		18	0.773684	0.630216		0.361715	0.55432	0.656878	0.711488	0.740566	0.756049	0.764294	0.768684	0.771022	0.772267	0.772929	0.773282	0.77347	0.77357	0.773624	0.773652	0.773667	0.773675	0.773679	0.773682	0.773683	0.773683	0.773684	0.773684	0.773684	0.773684	0.773684	0.773684	0.773684	0.773684	0.773684	0.773684	0.773684	0.773684	0.773684	0.773684	0.773684	0.773684	0.773684	0.773684	0.773684	0.773684	0.773684	0.773684
		19	0.786842	0.632324		0.368749	0.564686	0.668798	0.724119	0.753514	0.769133	0.777432	0.781842	0.784185	0.78543	0.786092	0.786444	0.78663	0.78673	0.786782	0.78681	0.786825	0.786833	0.786837	0.78684	0.786841	0.786841	0.786842	0.786842	0.786842	0.786842	0.786842	0.786842	0.786842	0.786842	0.786842	0.786842	0.786842	0.786842	0.786842	0.786842	0.786842	0.786842	0.786842	0.786842	0.786842	0.786842	0.786842	0.786842
		20	0.8	0.634397		0.375796	0.575063	0.680726	0.736754	0.766464	0.782217	0.790571	0.795	0.797349	0.798594	0.799255	0.799605	0.79979	0.799889	0.799941	0.799969	0.799983	0.799991	0.799995	0.799998	0.799999	0.799999	0.8	0.8	0.8	0.8	0.8	0.8	0.8	0.8	0.8	0.8	0.8	0.8	0.8	0.8	0.8	0.8	0.8	0.8	0.8	0.8	0.8	0.8
	wholesale only
		Cluster	final takeup	growth rate	0	1	2	3	4	5	6	7	8	9	10	11	12	13	14	15	16	17	18	19	20	21	22	23	24	25	26	27	28	29	30	31	32	33	34	35	36	37	38	39	40	41	42	43	44
		1	0.65	0.695362	0	0.325719	0.488218	0.569288	0.609733	0.629911	0.639978	0.645	0.647506	0.648756	0.649379	0.64969	0.649845	0.649923	0.649962	0.649981	0.64999	0.649995	0.649998	0.649999	0.649999	0.65	0.65	0.65	0.65	0.65	0.65	0.65	0.65	0.65	0.65	0.65	0.65	0.65	0.65	0.65	0.65	0.65	0.65	0.65	0.65	0.65	0.65	0.65	0.65
		2	0.657895	0.697087	0	0.330241	0.494712	0.576624	0.617419	0.637737	0.647855	0.652895	0.655405	0.656655	0.657277	0.657587	0.657742	0.657818	0.657857	0.657876	0.657885	0.65789	0.657892	0.657894	0.657894	0.657894	0.657895	0.657895	0.657895	0.657895	0.657895	0.657895	0.657895	0.657895	0.657895	0.657895	0.657895	0.657895	0.657895	0.657895	0.657895	0.657895	0.657895	0.657895	0.657895	0.657895	0.657895	0.657895	0.657895
		3	0.665789	0.698791	0	0.334768	0.50121	0.583963	0.625106	0.645562	0.655733	0.660789	0.663304	0.664554	0.665175	0.665484	0.665638	0.665714	0.665752	0.665771	0.66578	0.665785	0.665787	0.665788	0.665789	0.665789	0.665789	0.665789	0.665789	0.665789	0.665789	0.665789	0.665789	0.665789	0.665789	0.665789	0.665789	0.665789	0.665789	0.665789	0.665789	0.665789	0.665789	0.665789	0.665789	0.665789	0.665789	0.665789	0.665789
		4	0.673684	0.700475	0	0.339301	0.507713	0.591305	0.632795	0.653389	0.663611	0.668684	0.671202	0.672452	0.673073	0.673381	0.673534	0.673609	0.673647	0.673666	0.673675	0.67368	0.673682	0.673683	0.673684	0.673684	0.673684	0.673684	0.673684	0.673684	0.673684	0.673684	0.673684	0.673684	0.673684	0.673684	0.673684	0.673684	0.673684	0.673684	0.673684	0.673684	0.673684	0.673684	0.673684	0.673684	0.673684	0.673684	0.673684
		5	0.681579	0.702139	0	0.34384	0.514221	0.598649	0.640485	0.661216	0.671489	0.676579	0.679101	0.680351	0.680971	0.681277	0.68143	0.681505	0.681542	0.681561	0.68157	0.681574	0.681577	0.681578	0.681578	0.681579	0.681579	0.681579	0.681579	0.681579	0.681579	0.681579	0.681579	0.681579	0.681579	0.681579	0.681579	0.681579	0.681579	0.681579	0.681579	0.681579	0.681579	0.681579	0.681579	0.681579	0.681579	0.681579	0.681579
		6	0.689474	0.703784	0	0.348384	0.520734	0.605996	0.648177	0.669044	0.679367	0.684474	0.687	0.68825	0.688868	0.689174	0.689326	0.6894	0.689437	0.689456	0.689465	0.689469	0.689472	0.689473	0.689473	0.689473	0.689474	0.689474	0.689474	0.689474	0.689474	0.689474	0.689474	0.689474	0.689474	0.689474	0.689474	0.689474	0.689474	0.689474	0.689474	0.689474	0.689474	0.689474	0.689474	0.689474	0.689474	0.689474	0.689474
		7	0.697368	0.705411	0	0.352934	0.52725	0.613346	0.655869	0.676872	0.687245	0.692368	0.694899	0.696149	0.696766	0.697071	0.697221	0.697296	0.697333	0.697351	0.69736	0.697364	0.697366	0.697367	0.697368	0.697368	0.697368	0.697368	0.697368	0.697368	0.697368	0.697368	0.697368	0.697368	0.697368	0.697368	0.697368	0.697368	0.697368	0.697368	0.697368	0.697368	0.697368	0.697368	0.697368	0.697368	0.697368	0.697368	0.697368
		8	0.705263	0.707019	0	0.357489	0.533772	0.620699	0.663563	0.684701	0.695123	0.700263	0.702798	0.704047	0.704664	0.704968	0.705117	0.705191	0.705228	0.705246	0.705255	0.705259	0.705261	0.705262	0.705263	0.705263	0.705263	0.705263	0.705263	0.705263	0.705263	0.705263	0.705263	0.705263	0.705263	0.705263	0.705263	0.705263	0.705263	0.705263	0.705263	0.705263	0.705263	0.705263	0.705263	0.705263	0.705263	0.705263	0.705263
		9	0.713158	0.708609	0	0.36205	0.540298	0.628054	0.671259	0.69253	0.703002	0.708158	0.710696	0.711946	0.712561	0.712864	0.713013	0.713087	0.713123	0.713141	0.713149	0.713154	0.713156	0.713157	0.713157	0.713158	0.713158	0.713158	0.713158	0.713158	0.713158	0.713158	0.713158	0.713158	0.713158	0.713158	0.713158	0.713158	0.713158	0.713158	0.713158	0.713158	0.713158	0.713158	0.713158	0.713158	0.713158	0.713158	0.713158
		10	0.721053	0.710182	0	0.366616	0.546828	0.635411	0.678955	0.700359	0.710881	0.716053	0.718595	0.719845	0.720459	0.720761	0.720909	0.720982	0.721018	0.721036	0.721044	0.721049	0.721051	0.721052	0.721052	0.721052	0.721053	0.721053	0.721053	0.721053	0.721053	0.721053	0.721053	0.721053	0.721053	0.721053	0.721053	0.721053	0.721053	0.721053	0.721053	0.721053	0.721053	0.721053	0.721053	0.721053	0.721053	0.721053	0.721053
		11	0.728947	0.711738	0	0.371187	0.553362	0.642772	0.686653	0.70819	0.71876	0.723947	0.726493	0.727743	0.728356	0.728657	0.728805	0.728877	0.728913	0.728931	0.728939	0.728943	0.728945	0.728946	0.728947	0.728947	0.728947	0.728947	0.728947	0.728947	0.728947	0.728947	0.728947	0.728947	0.728947	0.728947	0.728947	0.728947	0.728947	0.728947	0.728947	0.728947	0.728947	0.728947	0.728947	0.728947	0.728947	0.728947	0.728947
		12	0.736842	0.713277	0	0.375763	0.5599	0.650134	0.694352	0.716021	0.726639	0.731842	0.734392	0.735641	0.736254	0.736554	0.736701	0.736773	0.736808	0.736825	0.736834	0.736838	0.73684	0.736841	0.736842	0.736842	0.736842	0.736842	0.736842	0.736842	0.736842	0.736842	0.736842	0.736842	0.736842	0.736842	0.736842	0.736842	0.736842	0.736842	0.736842	0.736842	0.736842	0.736842	0.736842	0.736842	0.736842	0.736842	0.736842
		13	0.744737	0.714799	0	0.380344	0.566443	0.657499	0.702052	0.723852	0.734518	0.739737	0.74229	0.74354	0.744151	0.74445	0.744597	0.744668	0.744703	0.74472	0.744729	0.744733	0.744735	0.744736	0.744736	0.744737	0.744737	0.744737	0.744737	0.744737	0.744737	0.744737	0.744737	0.744737	0.744737	0.744737	0.744737	0.744737	0.744737	0.744737	0.744737	0.744737	0.744737	0.744737	0.744737	0.744737	0.744737	0.744737	0.744737
		14	0.752632	0.716305	0	0.38493	0.57299	0.664867	0.709754	0.731683	0.742397	0.747632	0.750189	0.751438	0.752049	0.752347	0.752492	0.752564	0.752598	0.752615	0.752624	0.752628	0.75263	0.752631	0.752631	0.752631	0.752631	0.752632	0.752632	0.752632	0.752632	0.752632	0.752632	0.752632	0.752632	0.752632	0.752632	0.752632	0.752632	0.752632	0.752632	0.752632	0.752632	0.752632	0.752632	0.752632	0.752632	0.752632	0.752632
		15	0.760526	0.717796	0	0.389522	0.579541	0.672237	0.717456	0.739516	0.750277	0.755526	0.758087	0.759336	0.759946	0.760243	0.760388	0.760459	0.760493	0.76051	0.760518	0.760522	0.760524	0.760525	0.760526	0.760526	0.760526	0.760526	0.760526	0.760526	0.760526	0.760526	0.760526	0.760526	0.760526	0.760526	0.760526	0.760526	0.760526	0.760526	0.760526	0.760526	0.760526	0.760526	0.760526	0.760526	0.760526	0.760526	0.760526
		16	0.768421	0.719271	0	0.394118	0.586095	0.679609	0.72516	0.747348	0.758156	0.763421	0.765986	0.767235	0.767843	0.76814	0.768284	0.768354	0.768389	0.768405	0.768413	0.768417	0.768419	0.76842	0.768421	0.768421	0.768421	0.768421	0.768421	0.768421	0.768421	0.768421	0.768421	0.768421	0.768421	0.768421	0.768421	0.768421	0.768421	0.768421	0.768421	0.768421	0.768421	0.768421	0.768421	0.768421	0.768421	0.768421	0.768421
		17	0.776316	0.720732	0	0.398719	0.592654	0.686983	0.732865	0.755181	0.766036	0.771316	0.773884	0.775133	0.77574	0.776036	0.77618	0.77625	0.776284	0.7763	0.776308	0.776312	0.776314	0.776315	0.776315	0.776316	0.776316	0.776316	0.776316	0.776316	0.776316	0.776316	0.776316	0.776316	0.776316	0.776316	0.776316	0.776316	0.776316	0.776316	0.776316	0.776316	0.776316	0.776316	0.776316	0.776316	0.776316	0.776316	0.776316
		18	0.784211	0.722177	0	0.403324	0.599217	0.69436	0.740571	0.763015	0.773916	0.779211	0.781782	0.783031	0.783638	0.783932	0.784075	0.784145	0.784179	0.784195	0.784203	0.784207	0.784209	0.78421	0.78421	0.78421	0.78421	0.78421	0.784211	0.784211	0.784211	0.784211	0.784211	0.784211	0.784211	0.784211	0.784211	0.784211	0.784211	0.784211	0.784211	0.784211	0.784211	0.784211	0.784211	0.784211	0.784211	0.784211	0.784211
		19	0.792105	0.723608	0	0.407935	0.605783	0.701739	0.748278	0.770849	0.781796	0.787105	0.78968	0.790929	0.791535	0.791829	0.791971	0.79204	0.792074	0.79209	0.792098	0.792102	0.792104	0.792104	0.792105	0.792105	0.792105	0.792105	0.792105	0.792105	0.792105	0.792105	0.792105	0.792105	0.792105	0.792105	0.792105	0.792105	0.792105	0.792105	0.792105	0.792105	0.792105	0.792105	0.792105	0.792105	0.792105	0.792105	0.792105
		20	0.8	0.725025	0	0.41255	0.612353	0.70912	0.755986	0.778683	0.789676	0.795	0.797578	0.798827	0.799432	0.799725	0.799867	0.799935	0.799969	0.799985	0.799993	0.799996	0.799998	0.799999	0.8	0.8	0.8	0.8	0.8	0.8	0.8	0.8	0.8	0.8	0.8	0.8	0.8	0.8	0.8	0.8	0.8	0.8	0.8	0.8	0.8	0.8	0.8	0.8	0.8
[truncated: 311 more columns]

## Sheet: Revenue and operating cost mode
	revenue	integriert
		Cluster	Households	1	2	3	4	5	6	7	8	9	10	11	12	13	14	15	16	17	18	19	20	21	22	23	24	25	26	27	28	29	30	31	32	33	34	35	36	37	38	39	40	41	42	43	44	45	46
		1	2038700	2.69032e+08	4.18528e+08	5.01601e+08	5.47762e+08	5.73414e+08	5.87667e+08	5.95588e+08	599989410	6.02435e+08	6.03794e+08	6.04549e+08	6.04969e+08	6.05202e+08	6.05332e+08	6.05404e+08	6.05444e+08	6.05466e+08	6.05478e+08	6.05485e+08	6.05489e+08	6.05491e+08	6.05492e+08	6.05493e+08	6.05493e+08	6.05494e+08	6.05494e+08	6.05494e+08	6.05494e+08	6.05494e+08	6.05494e+08	6.05494e+08	6.05494e+08	6.05494e+08	6.05494e+08	6.05494e+08	6.05494e+08	6.05494e+08	6.05494e+08	6.05494e+08	6.05494e+08	6.05494e+08	6.05494e+08	6.05494e+08	6.05494e+08	6.05494e+08	6.05494e+08
		2	2038700	2.76485e+08	4.29669e+08	5.1454e+08	5.61561e+08	5.87613e+08	6.02047e+08	6.10044e+08	6.14475e+08	6.1693e+08	6.1829e+08	6.19043e+08	6.19461e+08	6.19692e+08	6.1982e+08	6.19891e+08	6.19931e+08	6.19952e+08	6.19964e+08	6.19971e+08	6.19975e+08	6.19977e+08	6.19978e+08	6.19979e+08	6.19979e+08	6.19979e+08	6.19979e+08	6.19979e+08	6.19979e+08	6.19979e+08	6.19979e+08	6.19979e+08	6.19979e+08	6.19979e+08	6.19979e+08	6.19979e+08	6.19979e+08	6.19979e+08	6.19979e+08	6.19979e+08	6.19979e+08	6.19979e+08	6.19979e+08	6.19979e+08	6.19979e+08	6.19979e+08	6.19979e+08
		3	2038700	2.83958e+08	4.40829e+08	5.27492e+08	5.75368e+08	6.01817e+08	6.16429e+08	6.24501e+08	6.2896e+08	6.31424e+08	6.32785e+08	6.33537e+08	6.33952e+08	6.34182e+08	6.34308e+08	6.34378e+08	6.34417e+08	6.34439e+08	6.3445e+08	6.34457e+08	6.3446e+08	6.34462e+08	6.34464e+08	6.34464e+08	6.34464e+08	6.34465e+08	6.34465e+08	6.34465e+08	6.34465e+08	6.34465e+08	6.34465e+08	6.34465e+08	6.34465e+08	6.34465e+08	6.34465e+08	6.34465e+08	6.34465e+08	6.34465e+08	6.34465e+08	6.34465e+08	6.34465e+08	6.34465e+08	6.34465e+08	6.34465e+08	6.34465e+08	6.34465e+08	6.34465e+08
		4	2038700	2.91452e+08	4.52009e+08	5.40458e+08	5.89183e+08	6.16025e+08	6.30812e+08	6.38958e+08	6.43446e+08	6.45918e+08	6.4728e+08	6.4803e+08	6.48443e+08	6.48671e+08	6.48797e+08	6.48866e+08	6.48904e+08	6.48925e+08	6.48936e+08	6.48943e+08	6.48946e+08	6.48948e+08	6.48949e+08	6.4895e+08	6.4895e+08	6.4895e+08	6.4895e+08	6.4895e+08	6.4895e+08	6.4895e+08	6.4895e+08	6.4895e+08	6.4895e+08	6.4895e+08	6.4895e+08	6.4895e+08	6.4895e+08	6.4895e+08	6.4895e+08	6.4895e+08	6.4895e+08	6.4895e+08	6.4895e+08	6.4895e+08	6.4895e+08	6.4895e+08	6.4895e+08
		5	2038700	2.98964e+08	4.63206e+08	5.53436e+08	6.03005e+08	6.30237e+08	6.45197e+08	6.53416e+08	6.57931e+08	6.60412e+08	6.61775e+08	6.62523e+08	6.62935e+08	6.6316e+08	6.63285e+08	6.63353e+08	6.6339e+08	6.63411e+08	6.63422e+08	6.63428e+08	6.63432e+08	6.63434e+08	6.63435e+08	6.63435e+08	6.63436e+08	6.63436e+08	6.63436e+08	6.63436e+08	6.63436e+08	6.63436e+08	6.63436e+08	6.63436e+08	6.63436e+08	6.63436e+08	6.63436e+08	6.63436e+08	6.63436e+08	6.63436e+08	6.63436e+08	6.63436e+08	6.63436e+08	6.63436e+08	6.63436e+08	6.63436e+08	6.63436e+08	6.63436e+08	6.63436e+08
		6	2038700	3.06496e+08	4.74422e+08	5.66426e+08	6.16834e+08	6.44453e+08	6.59584e+08	6.67875e+08	6.72417e+08	6.74906e+08	6.76269e+08	6.77016e+08	6.77425e+08	6.7765e+08	6.77773e+08	6.7784e+08	6.77877e+08	6.77897e+08	6.77908e+08	6.77914e+08	6.77917e+08	6.77919e+08	6.7792e+08	6.77921e+08	6.77921e+08	6.77921e+08	6.77921e+08	6.77921e+08	6.77921e+08	6.77921e+08	6.77921e+08	6.77921e+08	6.77921e+08	6.77921e+08	6.77921e+08	6.77921e+08	6.77921e+08	6.77921e+08	6.77921e+08	6.77921e+08	6.77921e+08	6.77921e+08	6.77921e+08	6.77921e+08	6.77921e+08	6.77921e+08	6.77921e+08
		7	2038700	3.14046e+08	4.85655e+08	5.79429e+08	6.30671e+08	6.58672e+08	6.73973e+08	6.82334e+08	6.86902e+08	6.89399e+08	6.90763e+08	6.91509e+08	6.91916e+08	6.92139e+08	6.9226e+08	6.92327e+08	6.92363e+08	6.92383e+08	6.92394e+08	6.924e+08	6.92403e+08	6.92405e+08	6.92406e+08	6.92406e+08	6.92407e+08	6.92407e+08	6.92407e+08	6.92407e+08	6.92407e+08	6.92407e+08	6.92407e+08	6.92407e+08	6.92407e+08	6.92407e+08	6.92407e+08	6.92407e+08	6.92407e+08	6.92407e+08	6.92407e+08	6.92407e+08	6.92407e+08	6.92407e+08	6.92407e+08	6.92407e+08	6.92407e+08	6.92407e+08	6.92407e+08
		8	2038700	3.21615e+08	4.96905e+08	5.92443e+08	6.44514e+08	6.72894e+08	6.88362e+08	6.96793e+08	7.01388e+08	7.03892e+08	7.05257e+08	7.06001e+08	7.06407e+08	7.06628e+08	7.06748e+08	7.06814e+08	7.0685e+08	7.06869e+08	7.0688e+08	7.06885e+08	7.06889e+08	7.0689e+08	7.06891e+08	7.06892e+08	7.06892e+08	7.06892e+08	7.06892e+08	7.06892e+08	7.06892e+08	7.06892e+08	7.06892e+08	7.06892e+08	7.06892e+08	7.06892e+08	7.06892e+08	7.06892e+08	7.06892e+08	7.06892e+08	7.06892e+08	7.06892e+08	7.06892e+08	7.06892e+08	7.06892e+08	7.06892e+08	7.06892e+08	7.06892e+08	7.06892e+08
		9	2038700	3.29201e+08	5.08171e+08	6.05468e+08	6.58363e+08	6.8712e+08	7.02754e+08	7.11253e+08	7.15873e+08	7.18385e+08	7.19751e+08	7.20493e+08	7.20897e+08	7.21116e+08	7.21236e+08	7.21301e+08	7.21336e+08	7.21355e+08	7.21365e+08	7.21371e+08	7.21374e+08	7.21376e+08	7.21377e+08	7.21377e+08	7.21378e+08	7.21378e+08	7.21378e+08	7.21378e+08	7.21378e+08	7.21378e+08	7.21378e+08	7.21378e+08	7.21378e+08	7.21378e+08	7.21378e+08	7.21378e+08	7.21378e+08	7.21378e+08	7.21378e+08	7.21378e+08	7.21378e+08	7.21378e+08	7.21378e+08	7.21378e+08	7.21378e+08	7.21378e+08	7.21378e+08
		10	2038700	3.36804e+08	5.19453e+08	6.18504e+08	6.72219e+08	7.01349e+08	7.17146e+08	7.25713e+08	7.30359e+08	7.32878e+08	7.34245e+08	7.34986e+08	7.35387e+08	7.35605e+08	7.35723e+08	7.35787e+08	7.35822e+08	7.35841e+08	7.35851e+08	7.35857e+08	7.3586e+08	7.35861e+08	7.35862e+08	7.35863e+08	7.35863e+08	7.35863e+08	7.35863e+08	7.35863e+08	7.35863e+08	7.35863e+08	7.35863e+08	7.35863e+08	7.35863e+08	7.35863e+08	7.35863e+08	7.35863e+08	7.35863e+08	7.35863e+08	7.35863e+08	7.35863e+08	7.35863e+08	7.35863e+08	7.35863e+08	7.35863e+08	7.35863e+08	7.35863e+08	7.35863e+08
		11	2038700	3.44425e+08	5.30752e+08	6.31551e+08	6.86082e+08	7.15582e+08	7.3154e+08	7.40174e+08	7.44844e+08	7.47371e+08	7.48738e+08	7.49477e+08	7.49877e+08	7.50094e+08	7.50211e+08	7.50274e+08	7.50309e+08	7.50327e+08	7.50337e+08	7.50343e+08	7.50345e+08	7.50347e+08	7.50348e+08	7.50348e+08	7.50349e+08	7.50349e+08	7.50349e+08	7.50349e+08	7.50349e+08	7.50349e+08	7.50349e+08	7.50349e+08	7.50349e+08	7.50349e+08	7.50349e+08	7.50349e+08	7.50349e+08	7.50349e+08	7.50349e+08	7.50349e+08	7.50349e+08	7.50349e+08	7.50349e+08	7.50349e+08	7.50349e+08	7.50349e+08	7.50349e+08
		12	2038700	3.52062e+08	5.42065e+08	6.44608e+08	6.9995e+08	7.29817e+08	7.45936e+08	7.54635e+08	7.5933e+08	7.61864e+08	7.63231e+08	7.63969e+08	7.64367e+08	7.64582e+08	7.64698e+08	7.64761e+08	7.64795e+08	7.64813e+08	7.64823e+08	7.64828e+08	7.64831e+08	7.64833e+08	7.64833e+08	7.64834e+08	7.64834e+08	7.64834e+08	7.64834e+08	7.64834e+08	7.64834e+08	7.64834e+08	7.64834e+08	7.64834e+08	7.64834e+08	7.64834e+08	7.64834e+08	7.64834e+08	7.64834e+08	7.64834e+08	7.64834e+08	7.64834e+08	7.64834e+08	7.64834e+08	7.64834e+08	7.64834e+08	7.64834e+08	7.64834e+08	7.64834e+08
		13	2038700	3.59715e+08	5.53394e+08	6.57676e+08	7.13824e+08	7.44055e+08	7.60332e+08	7.69097e+08	7.73815e+08	7.76356e+08	7.77724e+08	7.78461e+08	7.78857e+08	7.79071e+08	7.79186e+08	7.79248e+08	7.79281e+08	7.79299e+08	7.79309e+08	7.79314e+08	7.79317e+08	7.79318e+08	7.79319e+08	7.79319e+08	7.7932e+08	7.7932e+08	7.7932e+08	7.7932e+08	7.7932e+08	7.7932e+08	7.7932e+08	7.7932e+08	7.7932e+08	7.7932e+08	7.7932e+08	7.7932e+08	7.7932e+08	7.7932e+08	7.7932e+08	7.7932e+08	7.7932e+08	7.7932e+08	7.7932e+08	7.7932e+08	7.7932e+08	7.7932e+08	7.7932e+08
		14	2038700	3.67384e+08	5.64737e+08	6.70753e+08	7.27703e+08	7.58296e+08	7.7473e+08	7.83559e+08	7.88301e+08	7.90848e+08	7.92217e+08	7.92952e+08	7.93347e+08	7.93559e+08	7.93673e+08	7.93734e+08	7.93767e+08	7.93785e+08	7.93794e+08	7.93799e+08	7.93802e+08	7.93804e+08	7.93804e+08	7.93805e+08	7.93805e+08	7.93805e+08	7.93805e+08	7.93805e+08	7.93805e+08	7.93805e+08	7.93805e+08	7.93805e+08	7.93805e+08	7.93805e+08	7.93805e+08	7.93805e+08	7.93805e+08	7.93805e+08	7.93805e+08	7.93805e+08	7.93805e+08	7.93805e+08	7.93805e+08	7.93805e+08	7.93805e+08	7.93805e+08	7.93805e+08
		15	2038700	3.75068e+08	5.76095e+08	6.8384e+08	7.41588e+08	7.7254e+08	7.89129e+08	7.98021e+08	8.02786e+08	8.05341e+08	8.0671e+08	8.07443e+08	8.07837e+08	8.08047e+08	8.0816e+08	8.08221e+08	8.08253e+08	8.08271e+08	8.0828e+08	8.08285e+08	8.08288e+08	8.08289e+08	8.0829e+08	8.0829e+08	8.08291e+08	8.08291e+08	8.08291e+08	8.08291e+08	8.08291e+08	8.08291e+08	8.08291e+08	8.08291e+08	8.08291e+08	8.08291e+08	8.08291e+08	8.08291e+08	8.08291e+08	8.08291e+08	8.08291e+08	8.08291e+08	8.08291e+08	8.08291e+08	8.08291e+08	8.08291e+08	8.08291e+08	8.08291e+08	8.08291e+08
		16	2038700	3.82768e+08	5.87466e+08	6.96936e+08	7.55479e+08	7.86787e+08	8.0353e+08	8.12484e+08	8.17272e+08	8.19833e+08	8.21202e+08	8.21935e+08	8.22326e+08	8.22536e+08	8.22648e+08	8.22708e+08	8.2274e+08	8.22757e+08	8.22766e+08	8.22771e+08	8.22773e+08	8.22775e+08	8.22776e+08	8.22776e+08	8.22776e+08	8.22776e+08	8.22776e+08	8.22776e+08	8.22776e+08	8.22776e+08	8.22776e+08	8.22776e+08	8.22776e+08	8.22776e+08	8.22776e+08	8.22776e+08	8.22776e+08	8.22776e+08	8.22776e+08	8.22776e+08	8.22776e+08	8.22776e+08	8.22776e+08	8.22776e+08	8.22776e+08	8.22776e+08	8.22776e+08
		17	2038700	3.90482e+08	5.98851e+08	7.10041e+08	7.69374e+08	8.01036e+08	8.17931e+08	8.26947e+08	8.31757e+08	8.34325e+08	8.35694e+08	8.36426e+08	8.36816e+08	8.37024e+08	8.37135e+08	8.37194e+08	8.37226e+08	8.37243e+08	8.37252e+08	8.37256e+08	8.37259e+08	8.3726e+08	8.37261e+08	8.37261e+08	8.37262e+08	8.37262e+08	8.37262e+08	8.37262e+08	8.37262e+08	8.37262e+08	8.37262e+08	8.37262e+08	8.37262e+08	8.37262e+08	8.37262e+08	8.37262e+08	8.37262e+08	8.37262e+08	8.37262e+08	8.37262e+08	8.37262e+08	8.37262e+08	8.37262e+08	8.37262e+08	8.37262e+08	8.37262e+08	8.37262e+08
		18	2038700	3.98212e+08	6.1025e+08	7.23156e+08	7.83275e+08	8.15288e+08	8.32333e+08	8.4141e+08	8.46243e+08	8.48816e+08	8.50187e+08	8.50916e+08	8.51305e+08	8.51512e+08	8.51622e+08	8.51681e+08	8.51712e+08	8.51728e+08	8.51737e+08	8.51742e+08	8.51745e+08	8.51746e+08	8.51747e+08	8.51747e+08	8.51747e+08	8.51747e+08	8.51747e+08	8.51747e+08	8.51747e+08	8.51747e+08	8.51747e+08	8.51747e+08	8.51747e+08	8.51747e+08	8.51747e+08	8.51747e+08	8.51747e+08	8.51747e+08	8.51747e+08	8.51747e+08	8.51747e+08	8.51747e+08	8.51747e+08	8.51747e+08	8.51747e+08	8.51747e+08	8.51747e+08
		19	2038700	4.05955e+08	6.21662e+08	7.36279e+08	7.97181e+08	8.29542e+08	8.46737e+08	8.55874e+08	8.60728e+08	8.63308e+08	8.64679e+08	8.65407e+08	8.65794e+08	8.66e+08	8.66109e+08	8.66167e+08	8.66198e+08	8.66214e+08	8.66223e+08	8.66228e+08	8.6623e+08	8.66231e+08	8.66232e+08	8.66232e+08	8.66233e+08	8.66233e+08	8.66233e+08	8.66233e+08	8.66233e+08	8.66233e+08	8.66233e+08	8.66233e+08	8.66233e+08	8.66233e+08	8.66233e+08	8.66233e+08	8.66233e+08	8.66233e+08	8.66233e+08	8.66233e+08	8.66233e+08	8.66233e+08	8.66233e+08	8.66233e+08	8.66233e+08	8.66233e+08	8.66233e+08
		20	2038700	4.13713e+08	6.33086e+08	7.4941e+08	8.11091e+08	8.43798e+08	8.61141e+08	8.70338e+08	875213910	8.778e+08	8.79171e+08	8.79898e+08	8.80283e+08	8.80488e+08	8.80596e+08	8.80654e+08	8.80684e+08	8.807e+08	8.80709e+08	8.80713e+08	8.80716e+08	8.80717e+08	8.80718e+08	8.80718e+08	8.80718e+08	8.80718e+08	8.80718e+08	8.80718e+08	8.80718e+08	8.80718e+08	8.80718e+08	8.80718e+08	8.80718e+08	8.80718e+08	8.80718e+08	8.80718e+08	8.80718e+08	8.80718e+08	8.80718e+08	8.80718e+08	8.80718e+08	8.80718e+08	8.80718e+08	8.80718e+08	8.80718e+08	8.80718e+08	8.80718e+08
	revenue	wholesale only
		Cluster		1	2	3	4	5	6	7	8	9	10	11	12	13	14	15	16	17	18	19	20	21	22	23	24	25	26	27	28	29	30	31	32	33	34	35	36	37	38	39	40	41	42	43	44	45	46
		1	2038700	2.78898e+08	4.18039e+08	4.87455e+08	5.22087e+08	5.39364e+08	5.47984e+08	552283830	5.54429e+08	5.555e+08	5.56033e+08	5.563e+08	5.56433e+08	5.56499e+08	5.56532e+08	5.56549e+08	5.56557e+08	5.56561e+08	5.56563e+08	5.56564e+08	5.56565e+08	5.56565e+08	5.56565e+08	5.56565e+08	5.56565e+08	5.56565e+08	5.56565e+08	5.56565e+08	5.56565e+08	5.56565e+08	5.56565e+08	5.56565e+08	5.56565e+08	5.56565e+08	5.56565e+08	5.56565e+08	5.56565e+08	5.56565e+08	5.56565e+08	5.56565e+08	5.56565e+08	5.56565e+08	5.56565e+08	5.56565e+08	5.56565e+08	5.56565e+08	5.56565e+08
		2	2038700	2.8277e+08	4.23599e+08	4.93737e+08	5.28668e+08	5.46064e+08	5.54729e+08	559043730	5.61193e+08	5.62263e+08	5.62796e+08	5.63062e+08	5.63194e+08	5.6326e+08	5.63292e+08	5.63309e+08	5.63317e+08	5.63321e+08	5.63323e+08	5.63324e+08	5.63325e+08	5.63325e+08	5.63325e+08	5.63325e+08	5.63325e+08	5.63325e+08	5.63325e+08	5.63325e+08	5.63325e+08	5.63325e+08	5.63325e+08	5.63325e+08	5.63325e+08	5.63325e+08	5.63325e+08	5.63325e+08	5.63325e+08	5.63325e+08	5.63325e+08	5.63325e+08	5.63325e+08	5.63325e+08	5.63325e+08	5.63325e+08	5.63325e+08	5.63325e+08	5.63325e+08
		3	2038700	2.86647e+08	4.29163e+08	5.00021e+08	5.3525e+08	5.52765e+08	5.61474e+08	5.65804e+08	5.67956e+08	5.69027e+08	5.69559e+08	5.69823e+08	5.69955e+08	5.7002e+08	5.70053e+08	5.70069e+08	5.70077e+08	5.70081e+08	5.70083e+08	5.70084e+08	5.70084e+08	5.70085e+08	5.70085e+08	5.70085e+08	5.70085e+08	5.70085e+08	5.70085e+08	5.70085e+08	5.70085e+08	5.70085e+08	5.70085e+08	5.70085e+08	5.70085e+08	5.70085e+08	5.70085e+08	5.70085e+08	5.70085e+08	5.70085e+08	5.70085e+08	5.70085e+08	5.70085e+08	5.70085e+08	5.70085e+08	5.70085e+08	5.70085e+08	5.70085e+08	5.70085e+08
		4	2038700	2.90528e+08	4.34732e+08	5.06307e+08	5.41833e+08	5.59467e+08	5.68219e+08	5.72564e+08	5.7472e+08	5.7579e+08	5.76321e+08	5.76585e+08	5.76716e+08	5.76781e+08	5.76813e+08	5.76829e+08	5.76837e+08	5.76841e+08	5.76843e+08	5.76844e+08	5.76844e+08	5.76845e+08	5.76845e+08	5.76845e+08	5.76845e+08	5.76845e+08	5.76845e+08	5.76845e+08	5.76845e+08	5.76845e+08	5.76845e+08	5.76845e+08	5.76845e+08	5.76845e+08	5.76845e+08	5.76845e+08	5.76845e+08	5.76845e+08	5.76845e+08	5.76845e+08	5.76845e+08	5.76845e+08	5.76845e+08	5.76845e+08	5.76845e+08	5.76845e+08	5.76845e+08
		5	2038700	2.94414e+08	4.40304e+08	5.12596e+08	5.48418e+08	5.66169e+08	5.74965e+08	5.79323e+08	5.81483e+08	5.82553e+08	5.83084e+08	5.83347e+08	5.83477e+08	5.83541e+08	5.83573e+08	5.83589e+08	5.83597e+08	5.83601e+08	5.83603e+08	5.83604e+08	5.83604e+08	5.83604e+08	5.83605e+08	5.83605e+08	5.83605e+08	5.83605e+08	5.83605e+08	5.83605e+08	5.83605e+08	5.83605e+08	5.83605e+08	5.83605e+08	5.83605e+08	5.83605e+08	5.83605e+08	5.83605e+08	5.83605e+08	5.83605e+08	5.83605e+08	5.83605e+08	5.83605e+08	5.83605e+08	5.83605e+08	5.83605e+08	5.83605e+08	5.83605e+08	5.83605e+08
		6	2038700	2.98306e+08	4.4588e+08	5.18887e+08	5.55004e+08	5.72871e+08	5.8171e+08	5.86083e+08	5.88247e+08	5.89317e+08	5.89846e+08	5.90108e+08	5.90238e+08	5.90302e+08	5.90334e+08	5.90349e+08	5.90357e+08	5.90361e+08	5.90363e+08	5.90364e+08	5.90364e+08	5.90364e+08	5.90364e+08	5.90365e+08	5.90365e+08	5.90365e+08	5.90365e+08	5.90365e+08	5.90365e+08	5.90365e+08	5.90365e+08	5.90365e+08	5.90365e+08	5.90365e+08	5.90365e+08	5.90365e+08	5.90365e+08	5.90365e+08	5.90365e+08	5.90365e+08	5.90365e+08	5.90365e+08	5.90365e+08	5.90365e+08	5.90365e+08	5.90365e+08	5.90365e+08
		7	2038700	3.02201e+08	4.5146e+08	5.2518e+08	5.61591e+08	5.79574e+08	5.88456e+08	5.92843e+08	5.9501e+08	5.9608e+08	5.96609e+08	5.9687e+08	5.96999e+08	5.97062e+08	5.97094e+08	5.97109e+08	5.97117e+08	5.97121e+08	5.97123e+08	5.97124e+08	5.97124e+08	5.97124e+08	5.97124e+08	5.97124e+08	5.97124e+08	5.97124e+08	5.97124e+08	5.97124e+08	5.97124e+08	5.97124e+08	5.97124e+08	5.97124e+08	5.97124e+08	5.97124e+08	5.97124e+08	5.97124e+08	5.97124e+08	5.97124e+08	5.97124e+08	5.97124e+08	5.97124e+08	5.97124e+08	5.97124e+08	5.97124e+08	5.97124e+08	5.97124e+08	5.97124e+08
		8	2038700	3.06102e+08	4.57044e+08	5.31476e+08	5.68179e+08	5.86278e+08	5.95202e+08	5.99603e+08	6.01773e+08	6.02843e+08	6.03371e+08	6.03631e+08	6.0376e+08	6.03823e+08	6.03854e+08	6.03869e+08	6.03877e+08	6.03881e+08	6.03883e+08	6.03884e+08	6.03884e+08	6.03884e+08	6.03884e+08	6.03884e+08	6.03884e+08	6.03884e+08	6.03884e+08	6.03884e+08	6.03884e+08	6.03884e+08	6.03884e+08	6.03884e+08	6.03884e+08	6.03884e+08	6.03884e+08	6.03884e+08	6.03884e+08	6.03884e+08	6.03884e+08	6.03884e+08	6.03884e+08	6.03884e+08	6.03884e+08	6.03884e+08	6.03884e+08	6.03884e+08	6.03884e+08
		9	2038700	3.10007e+08	4.62632e+08	5.37774e+08	5.74768e+08	5.92981e+08	6.01948e+08	6.06363e+08	6.08537e+08	6.09607e+08	6.10133e+08	6.10393e+08	6.1052e+08	6.10583e+08	6.10614e+08	6.1063e+08	6.10637e+08	6.10641e+08	6.10643e+08	6.10643e+08	6.10644e+08	6.10644e+08	6.10644e+08	6.10644e+08	6.10644e+08	6.10644e+08	6.10644e+08	6.10644e+08	6.10644e+08	6.10644e+08	6.10644e+08	6.10644e+08	6.10644e+08	6.10644e+08	6.10644e+08	6.10644e+08	6.10644e+08	6.10644e+08	6.10644e+08	6.10644e+08	6.10644e+08	6.10644e+08	6.10644e+08	6.10644e+08	6.10644e+08	6.10644e+08	6.10644e+08
		10	2038700	3.13916e+08	4.68223e+08	5.44074e+08	5.81358e+08	5.99686e+08	6.08695e+08	6.13123e+08	6.153e+08	6.1637e+08	6.16896e+08	6.17154e+08	6.17281e+08	6.17344e+08	6.17375e+08	6.1739e+08	6.17397e+08	6.17401e+08	6.17402e+08	6.17403e+08	6.17404e+08	6.17404e+08	6.17404e+08	6.17404e+08	6.17404e+08	6.17404e+08	6.17404e+08	6.17404e+08	6.17404e+08	6.17404e+08	6.17404e+08	6.17404e+08	6.17404e+08	6.17404e+08	6.17404e+08	6.17404e+08	6.17404e+08	6.17404e+08	6.17404e+08	6.17404e+08	6.17404e+08	6.17404e+08	6.17404e+08	6.17404e+08	6.17404e+08	6.17404e+08	6.17404e+08
		11	2038700	3.1783e+08	4.73818e+08	5.50376e+08	5.87949e+08	6.0639e+08	6.15441e+08	6.19883e+08	6.22063e+08	6.23133e+08	6.23658e+08	6.23916e+08	6.24042e+08	6.24104e+08	6.24135e+08	6.2415e+08	6.24157e+08	6.24161e+08	6.24162e+08	6.24163e+08	6.24164e+08	6.24164e+08	6.24164e+08	6.24164e+08	6.24164e+08	6.24164e+08	6.24164e+08	6.24164e+08	6.24164e+08	6.24164e+08	6.24164e+08	6.24164e+08	6.24164e+08	6.24164e+08	6.24164e+08	6.24164e+08	6.24164e+08	6.24164e+08	6.24164e+08	6.24164e+08	6.24164e+08	6.24164e+08	6.24164e+08	6.24164e+08	6.24164e+08	6.24164e+08	6.24164e+08
		12	2038700	3.21749e+08	4.79417e+08	5.5668e+08	5.94542e+08	6.13095e+08	6.22187e+08	6.26643e+08	6.28826e+08	6.29896e+08	6.3042e+08	6.30677e+08	6.30803e+08	6.30865e+08	6.30895e+08	6.3091e+08	6.30917e+08	6.30921e+08	6.30922e+08	6.30923e+08	6.30924e+08	6.30924e+08	6.30924e+08	6.30924e+08	6.30924e+08	6.30924e+08	6.30924e+08	6.30924e+08	6.30924e+08	6.30924e+08	6.30924e+08	6.30924e+08	6.30924e+08	6.30924e+08	6.30924e+08	6.30924e+08	6.30924e+08	6.30924e+08	6.30924e+08	6.30924e+08	6.30924e+08	6.30924e+08	6.30924e+08	6.30924e+08	6.30924e+08	6.30924e+08	6.30924e+08
		13	2038700	3.25671e+08	4.85019e+08	5.62986e+08	6.01135e+08	6.19801e+08	6.28934e+08	6.33403e+08	6.35589e+08	6.36659e+08	6.37182e+08	6.37439e+08	6.37564e+08	6.37625e+08	6.37655e+08	6.3767e+08	6.37677e+08	6.37681e+08	6.37682e+08	6.37683e+08	6.37684e+08	6.37684e+08	6.37684e+08	6.37684e+08	6.37684e+08	6.37684e+08	6.37684e+08	6.37684e+08	6.37684e+08	6.37684e+08	6.37684e+08	6.37684e+08	6.37684e+08	6.37684e+08	6.37684e+08	6.37684e+08	6.37684e+08	6.37684e+08	6.37684e+08	6.37684e+08	6.37684e+08	6.37684e+08	6.37684e+08	6.37684e+08	6.37684e+08	6.37684e+08	6.37684e+08
		14	2038700	3.29598e+08	4.90625e+08	5.69295e+08	6.0773e+08	6.26507e+08	6.35681e+08	6.40163e+08	6.42352e+08	6.43422e+08	6.43945e+08	6.442e+08	6.44325e+08	6.44386e+08	6.44415e+08	6.4443e+08	6.44437e+08	6.4444e+08	6.44442e+08	6.44443e+08	6.44443e+08	6.44444e+08	6.44444e+08	6.44444e+08	6.44444e+08	6.44444e+08	6.44444e+08	6.44444e+08	6.44444e+08	6.44444e+08	6.44444e+08	6.44444e+08	6.44444e+08	6.44444e+08	6.44444e+08	6.44444e+08	6.44444e+08	6.44444e+08	6.44444e+08	6.44444e+08	6.44444e+08	6.44444e+08	6.44444e+08	6.44444e+08	6.44444e+08	6.44444e+08	6.44444e+08
		15	2038700	3.33529e+08	4.96234e+08	5.75605e+08	6.14325e+08	6.33213e+08	6.42427e+08	6.46922e+08	6.49115e+08	6.50185e+08	6.50707e+08	6.50961e+08	6.51085e+08	6.51146e+08	6.51176e+08	6.5119e+08	6.51197e+08	6.512e+08	6.51202e+08	6.51203e+08	6.51203e+08	6.51204e+08	6.51204e+08	6.51204e+08	6.51204e+08	6.51204e+08	6.51204e+08	6.51204e+08	6.51204e+08	6.51204e+08	6.51204e+08	6.51204e+08	6.51204e+08	6.51204e+08	6.51204e+08	6.51204e+08	6.51204e+08	6.51204e+08	6.51204e+08	6.51204e+08	6.51204e+08	6.51204e+08	6.51204e+08	6.51204e+08	6.51204e+08	6.51204e+08	6.51204e+08
		16	2038700	3.37465e+08	5.01846e+08	5.81918e+08	6.20921e+08	6.3992e+08	6.49174e+08	6.53682e+08	6.55878e+08	6.56948e+08	6.57469e+08	6.57723e+08	6.57846e+08	6.57906e+08	6.57936e+08	6.5795e+08	6.57957e+08	6.5796e+08	6.57962e+08	6.57963e+08	6.57963e+08	6.57963e+08	6.57964e+08	6.57964e+08	6.57964e+08	6.57964e+08	6.57964e+08	6.57964e+08	6.57964e+08	6.57964e+08	6.57964e+08	6.57964e+08	6.57964e+08	6.57964e+08	6.57964e+08	6.57964e+08	6.57964e+08	6.57964e+08	6.57964e+08	6.57964e+08	6.57964e+08	6.57964e+08	6.57964e+08	6.57964e+08	6.57964e+08	6.57964e+08	6.57964e+08
		17	2038700	3.41404e+08	5.07462e+08	5.88232e+08	6.27518e+08	6.46627e+08	6.55921e+08	6.60442e+08	6.62641e+08	6.63711e+08	6.64231e+08	6.64484e+08	6.64607e+08	6.64667e+08	6.64696e+08	6.6471e+08	6.64717e+08	6.6472e+08	6.64722e+08	6.64723e+08	6.64723e+08	6.64723e+08	6.64723e+08	6.64723e+08	6.64723e+08	6.64723e+08	6.64723e+08	6.64723e+08	6.64723e+08	6.64723e+08	6.64723e+08	6.64723e+08	6.64723e+08	6.64723e+08	6.64723e+08	6.64723e+08	6.64723e+08	6.64723e+08	6.64723e+08	6.64723e+08	6.64723e+08	6.64723e+08	6.64723e+08	6.64723e+08	6.64723e+08	6.64723e+08	6.64723e+08
		18	2038700	3.45348e+08	5.13082e+08	5.94549e+08	6.34117e+08	6.53335e+08	6.62669e+08	6.67202e+08	6.69404e+08	6.70473e+08	6.70993e+08	6.71245e+08	6.71368e+08	6.71427e+08	6.71456e+08	6.7147e+08	6.71477e+08	6.7148e+08	6.71482e+08	6.71483e+08	6.71483e+08	6.71483e+08	6.71483e+08	6.71483e+08	6.71483e+08	6.71483e+08	6.71483e+08	6.71483e+08	6.71483e+08	6.71483e+08	6.71483e+08	6.71483e+08	6.71483e+08	6.71483e+08	6.71483e+08	6.71483e+08	6.71483e+08	6.71483e+08	6.71483e+08	6.71483e+08	6.71483e+08	6.71483e+08	6.71483e+08	6.71483e+08	6.71483e+08	6.71483e+08	6.71483e+08
		19	2038700	3.49296e+08	5.18704e+08	6.00867e+08	6.40716e+08	6.60042e+08	6.69416e+08	6.73962e+08	6.76167e+08	6.77236e+08	6.77755e+08	6.78006e+08	6.78128e+08	6.78188e+08	6.78216e+08	6.7823e+08	6.78237e+08	6.7824e+08	6.78242e+08	6.78243e+08	6.78243e+08	6.78243e+08	6.78243e+08	6.78243e+08	6.78243e+08	6.78243e+08	6.78243e+08	6.78243e+08	6.78243e+08	6.78243e+08	6.78243e+08	6.78243e+08	6.78243e+08	6.78243e+08	6.78243e+08	6.78243e+08	6.78243e+08	6.78243e+08	6.78243e+08	6.78243e+08	6.78243e+08	6.78243e+08	6.78243e+08	6.78243e+08	6.78243e+08	6.78243e+08	6.78243e+08
		20	2038700	3.53248e+08	5.2433e+08	6.07187e+08	6.47316e+08	6.66751e+08	6.76163e+08	680721930	6.8293e+08	6.83999e+08	6.84517e+08	6.84768e+08	6.84889e+08	6.84948e+08	6.84976e+08	6.8499e+08	6.84997e+08	6.85e+08	6.85002e+08	6.85002e+08	6.85003e+08	6.85003e+08	6.85003e+08	6.85003e+08	6.85003e+08	6.85003e+08	6.85003e+08	6.85003e+08	6.85003e+08	6.85003e+08	6.85003e+08	6.85003e+08	6.85003e+08	6.85003e+08	6.85003e+08	6.85003e+08	6.85003e+08	6.85003e+08	6.85003e+08	6.85003e+08	6.85003e+08	6.85003e+08	6.85003e+08	6.85003e+08	6.85003e+08	6.85003e+08	6.85003e+08
	EBITDA diskontiert	integriert
		Cluster		1	2	3	4	5	6	7	8	9	10	11	12	13	14	15	16	17	18	19	20	21	22	23	24	25	26	27	28	29	30	31	32	33	34	35	36	37	38	39	40	41	42	43	44	45	46
	NPV	1	1.58318e+09	1.16011e+08	1.71882e+08	1.96189e+08	2.04042e+08	2.03426e+08	1.98555e+08	1.91649e+08	1.83871e+08	1.75829e+08	1.67834e+08	1.60042e+08	1.52527e+08	1.4532e+08	1.38429e+08	1.31853e+08	1.25583e+08	1.19607e+08	1.13914e+08	1.08491e+08	1.03325e+08	9.84051e+07	9.37193e+07	8.92566e+07	8.50064e+07	8.09585e+07	7.71033e+07	7.34317e+07	6.9935e+07	6.66047e+07	6.34331e+07	6.04125e+07	5.75357e+07	5.47959e+07	5.21866e+07	4.97015e+07	4.73348e+07	4.50807e+07	4.2934e+07	4.08895e+07	3.89424e+07	3.7088e+07	3.53219e+07	3.36399e+07	3.2038e+07	3.05124e+07	2.90594e+07
		2	1.78017e+09	1.19225e+08	1.76458e+08	2.0125e+08	2.09182e+08	2.08464e+08	2.03414e+08	1.963e+08	1.88311e+08	1.8006e+08	1.71864e+08	1.63879e+08	1.56181e+08	1.48799e+08	1.41743e+08	1.35008e+08	1.28588e+08	1.22469e+08	1.16639e+08	1.11086e+08	1.05797e+08	1.00759e+08	9.59614e+07	9.13919e+07	8.704e+07	8.28953e+07	7.89479e+07	7.51885e+07	7.16081e+07	6.81982e+07	6.49506e+07	6.18577e+07	5.89121e+07	5.61068e+07	5.3435e+07	5.08905e+07	4.84672e+07	4.61592e+07	4.39611e+07	4.18678e+07	3.98741e+07	3.79753e+07	3.61669e+07	3.44447e+07	3.28045e+07	3.12424e+07	2.97546e+07
		3	1.89042e+09	1.22448e+08	1.81041e+08	2.06316e+08	2.14326e+08	2.13503e+08	2.08273e+08	2.00952e+08	1.9275e+08	1.8429e+08	1.75893e+08	1.67716e+08	1.59834e+08	1.52278e+08	1.45056e+08	1.38164e+08	1.31593e+08	1.2533e+08	1.19365e+08	1.13682e+08	1.08269e+08	1.03114e+08	9.82036e+07	9.35273e+07	8.90736e+07	8.48321e+07	8.07925e+07	7.69452e+07	7.32812e+07	6.97916e+07	6.64682e+07	6.3303e+07	6.02886e+07	5.74177e+07	5.46835e+07	5.20796e+07	4.95996e+07	4.72377e+07	4.49883e+07	4.2846e+07	4.08057e+07	3.88626e+07	3.7012e+07	3.52495e+07	3.35709e+07	3.19723e+07	3.04498e+07
		4	1.96452e+09	1.25679e+08	1.85632e+08	2.11387e+08	2.19471e+08	2.18543e+08	2.13132e+08	2.05604e+08	1.97189e+08	1.88521e+08	1.79922e+08	1.71553e+08	1.63488e+08	1.55757e+08	1.48369e+08	1.41319e+08	1.34597e+08	1.28192e+08	1.2209e+08	1.16277e+08	1.10741e+08	1.05468e+08	1.00446e+08	9.56626e+07	9.11073e+07	8.67689e+07	8.2637e+07	7.87019e+07	7.49542e+07	7.1385e+07	6.79857e+07	6.47483e+07	6.1665e+07	5.87286e+07	5.5932e+07	5.32686e+07	5.0732e+07	4.83162e+07	4.60154e+07	4.38242e+07	4.17373e+07	3.97498e+07	3.7857e+07	3.60543e+07	3.43374e+07	3.27023e+07	3.1145e+07
		5	2.05307e+09	1.28918e+08	1.90231e+08	2.16463e+08	2.2462e+08	2.23585e+08	2.17993e+08	2.10257e+08	2.01628e+08	1.92751e+08	1.83951e+08	1.7539e+08	1.67141e+08	1.59237e+08	1.51682e+08	1.44474e+08	1.37602e+08	1.31054e+08	1.24815e+08	1.18873e+08	1.13213e+08	1.07822e+08	1.02688e+08	9.77979e+07	9.31409e+07	8.87057e+07	8.44816e+07	8.04587e+07	7.66273e+07	7.29784e+07	6.95032e+07	6.61936e+07	6.30415e+07	6.00395e+07	5.71805e+07	5.44576e+07	5.18644e+07	4.93947e+07	4.70425e+07	4.48024e+07	4.2669e+07	4.06371e+07	3.8702e+07	3.68591e+07	3.51039e+07	3.34323e+07	3.18402e+07
		6	2.17055e+09	1.32166e+08	1.94837e+08	2.21544e+08	2.29772e+08	2.28628e+08	2.22854e+08	2.14909e+08	2.06067e+08	1.96981e+08	1.8798e+08	1.79226e+08	1.70795e+08	1.62716e+08	1.54995e+08	1.47629e+08	1.40607e+08	1.33915e+08	1.27541e+08	1.21468e+08	1.15685e+08	1.10176e+08	1.0493e+08	9.99333e+07	9.51746e+07	9.06425e+07	8.63262e+07	8.22154e+07	7.83004e+07	7.45718e+07	7.10208e+07	6.76388e+07	6.44179e+07	6.13504e+07	5.8429e+07	5.56466e+07	5.29968e+07	5.04731e+07	4.80697e+07	4.57806e+07	4.36006e+07	4.15244e+07	3.9547e+07	3.76638e+07	3.58703e+07	3.41622e+07	3.25354e+07
		7	2.26633e+09	1.35422e+08	1.9945e+08	2.2663e+08	2.34926e+08	2.33672e+08	2.27715e+08	2.19562e+08	2.10507e+08	2.01211e+08	1.92009e+08	1.83063e+08	1.74448e+08	1.66195e+08	1.58309e+08	1.50785e+08	1.43612e+08	1.36777e+08	1.30266e+08	1.24064e+08	1.18157e+08	1.1253e+08	1.07172e+08	1.02069e+08	9.72082e+07	9.25793e+07	8.81708e+07	8.39722e+07	7.99735e+07	7.61652e+07	7.25383e+07	6.90841e+07	6.57944e+07	6.26613e+07	5.96775e+07	5.68357e+07	5.41292e+07	5.15516e+07	4.90968e+07	4.67589e+07	4.45322e+07	4.24117e+07	4.03921e+07	3.84686e+07	3.66368e+07	3.48922e+07	3.32306e+07
		8	2.457e+09	1.38686e+08	2.0407e+08	2.3172e+08	2.40082e+08	2.38718e+08	2.32577e+08	2.24215e+08	2.14946e+08	2.05441e+08	1.96038e+08	1.869e+08	1.78102e+08	1.69674e+08	1.61622e+08	1.5394e+08	1.46617e+08	1.39639e+08	1.32991e+08	1.26659e+08	1.20629e+08	1.14885e+08	1.09414e+08	1.04204e+08	9.92419e+07	9.45161e+07	9.00154e+07	8.57289e+07	8.16466e+07	7.77587e+07	7.40559e+07	7.05294e+07	6.71709e+07	6.39722e+07	6.09259e+07	5.80247e+07	5.52616e+07	5.26301e+07	5.01239e+07	4.77371e+07	4.54639e+07	4.32989e+07	4.12371e+07	3.92734e+07	3.74032e+07	3.56221e+07	3.39258e+07
		9	2.56092e+09	1.41957e+08	2.08697e+08	2.36815e+08	2.45241e+08	2.43765e+08	2.37439e+08	2.28867e+08	2.19385e+08	2.09671e+08	2.00067e+08	1.90736e+08	1.81755e+08	1.73153e+08	1.64935e+08	1.57095e+08	1.49621e+08	1.425e+08	1.35717e+08	1.29255e+08	1.231e+08	1.17239e+08	1.11656e+08	1.06339e+08	1.01276e+08	9.64529e+07	9.18599e+07	8.74857e+07	8.33197e+07	7.93521e+07	7.55734e+07	7.19747e+07	6.85473e+07	6.52831e+07	6.21744e+07	5.92137e+07	5.6394e+07	5.37086e+07	5.11511e+07	4.87153e+07	4.63955e+07	4.41862e+07	4.20821e+07	4.00782e+07	3.81697e+07	3.63521e+07	3.4621e+07
		10	2.75882e+09	1.45236e+08	2.13331e+08	2.41913e+08	2.50403e+08	2.48813e+08	2.42302e+08	2.3352e+08	2.23824e+08	2.13901e+08	2.04095e+08	1.94573e+08	1.85409e+08	1.76632e+08	1.68248e+08	1.6025e+08	1.52626e+08	1.45362e+08	1.38442e+08	1.3185e+08	1.25572e+08	1.19593e+08	1.13898e+08	1.08475e+08	1.03309e+08	9.83897e+07	9.37045e+07	8.92424e+07	8.49928e+07	8.09455e+07	7.70909e+07	7.34199e+07	6.99238e+07	6.65941e+07	6.34229e+07	6.04028e+07	5.75264e+07	5.47871e+07	5.21782e+07	4.96935e+07	4.73271e+07	4.50735e+07	4.29271e+07	4.0883e+07	3.89362e+07	3.70821e+07	3.53162e+07
		11	2.84828e+09	1.48522e+08	2.17971e+08	2.47016e+08	2.55566e+08	2.53862e+08	2.47165e+08	2.38174e+08	2.28263e+08	2.18131e+08	2.08124e+08	1.98409e+08	1.89062e+08	1.80111e+08	1.71561e+08	1.63405e+08	1.55631e+08	1.48224e+08	1.41167e+08	1.34446e+08	1.28044e+08	1.21947e+08	1.1614e+08	1.1061e+08	1.05343e+08	1.00327e+08	9.55491e+07	9.09991e+07	8.66658e+07	8.25389e+07	7.86085e+07	7.48652e+07	7.13002e+07	6.7905e+07	6.46714e+07	6.15918e+07	5.86589e+07	5.58656e+07	5.32053e+07	5.06717e+07	4.82588e+07	4.59607e+07	4.37721e+07	4.16878e+07	3.97026e+07	3.7812e+07	3.60114e+07
		12	2.96756e+09	1.51815e+08	2.22617e+08	2.52123e+08	2.60732e+08	2.58912e+08	2.52029e+08	2.42827e+08	2.32703e+08	2.22361e+08	2.12153e+08	2.02245e+08	1.92715e+08	1.8359e+08	1.74874e+08	1.6656e+08	1.58636e+08	1.51085e+08	1.43893e+08	1.37042e+08	1.30516e+08	1.24301e+08	1.18382e+08	1.12745e+08	1.07376e+08	1.02263e+08	9.73937e+07	9.27559e+07	8.83389e+07	8.41323e+07	8.0126e+07	7.63105e+07	7.26767e+07	6.92159e+07	6.59199e+07	6.27808e+07	5.97913e+07	5.69441e+07	5.42324e+07	5.16499e+07	4.91904e+07	4.6848e+07	4.46172e+07	4.24925e+07	4.04691e+07	3.8542e+07	3.67067e+07
		13	3.13835e+09	1.55115e+08	2.27269e+08	2.57234e+08	2.659e+08	2.63963e+08	2.56893e+08	2.4748e+08	2.37142e+08	2.26591e+08	2.16181e+08	2.06082e+08	1.96368e+08	1.87069e+08	1.78187e+08	1.69715e+08	1.61641e+08	1.53947e+08	1.46618e+08	1.39637e+08	1.32988e+08	1.26656e+08	1.20625e+08	1.14881e+08	1.0941e+08	1.042e+08	9.92382e+07	9.45126e+07	9.0012e+07	8.57257e+07	8.16436e+07	7.77558e+07	7.40531e+07	7.05268e+07	6.71684e+07	6.39699e+07	6.09237e+07	5.80225e+07	5.52596e+07	5.26282e+07	5.01221e+07	4.77353e+07	4.54622e+07	4.32973e+07	4.12355e+07	3.92719e+07	3.74019e+07
		14	3.28654e+09	1.58422e+08	2.31928e+08	2.62349e+08	2.7107e+08	2.69016e+08	2.61758e+08	2.52134e+08	2.41581e+08	2.30821e+08	2.2021e+08	2.09918e+08	2.00022e+08	1.90548e+08	1.815e+08	1.7287e+08	1.64645e+08	1.56809e+08	1.49343e+08	1.42233e+08	1.3546e+08	1.2901e+08	1.22867e+08	1.17016e+08	1.11444e+08	1.06137e+08	1.01083e+08	9.62694e+07	9.16851e+07	8.73191e+07	8.31611e+07	7.9201e+07	7.54296e+07	7.18377e+07	6.84168e+07	6.51589e+07	6.20561e+07	5.9101e+07	5.62867e+07	5.36064e+07	5.10537e+07	4.86226e+07	4.63072e+07	4.41021e+07	4.2002e+07	4.00019e+07	3.80971e+07
		15	3.36155e+09	1.61736e+08	2.36592e+08	2.67468e+08	2.76243e+08	2.74069e+08	2.66623e+08	2.56788e+08	2.4602e+08	2.3505e+08	2.24238e+08	2.13754e+08	2.03675e+08	1.94027e+08	1.84813e+08	1.76026e+08	1.6765e+08	1.5967e+08	1.52069e+08	1.44828e+08	1.37932e+08	1.31364e+08	1.25109e+08	1.19151e+08	1.13477e+08	1.08074e+08	1.02927e+08	9.80261e+07	9.33582e+07	8.89126e+07	8.46786e+07	8.06463e+07	7.6806e+07	7.31486e+07	6.96653e+07	6.63479e+07	6.31885e+07	6.01795e+07	5.73138e+07	5.45846e+07	5.19853e+07	4.95098e+07	4.71522e+07	4.49069e+07	4.27685e+07	4.07319e+07	3.87923e+07
		16	3.54047e+09	1.65056e+08	2.41262e+08	2.7259e+08	2.81417e+08	2.79123e+08	2.71488e+08	2.61442e+08	2.50459e+08	2.3928e+08	2.28267e+08	2.17591e+08	2.07328e+08	1.97505e+08	1.88126e+08	1.79181e+08	1.70655e+08	1.62532e+08	1.54794e+08	1.47424e+08	1.40404e+08	1.33718e+08	1.27351e+08	1.21287e+08	1.15511e+08	1.10011e+08	1.04772e+08	9.97828e+07	9.50313e+07	9.0506e+07	8.61962e+07	8.20916e+07	7.81825e+07	7.44595e+07	7.09138e+07	6.7537e+07	6.43209e+07	6.1258e+07	5.8341e+07	5.55628e+07	5.2917e+07	5.03971e+07	4.79973e+07	4.57117e+07	4.35349e+07	4.14618e+07	3.94875e+07
		17	3.73746e+09	1.68383e+08	2.45938e+08	2.77716e+08	2.86593e+08	2.84178e+08	2.76354e+08	2.66095e+08	2.54899e+08	2.4351e+08	2.32295e+08	2.21427e+08	2.10981e+08	2.00984e+08	1.91439e+08	1.82336e+08	1.7366e+08	1.65393e+08	1.57519e+08	1.50019e+08	1.42876e+08	1.36072e+08	1.29593e+08	1.23422e+08	1.17545e+08	1.11947e+08	1.06617e+08	1.0154e+08	9.67044e+07	9.20994e+07	8.77137e+07	8.35369e+07	7.95589e+07	7.57704e+07	7.21623e+07	6.8726e+07	6.54533e+07	6.23365e+07	5.93681e+07	5.6541e+07	5.38486e+07	5.12844e+07	4.88423e+07	4.65165e+07	4.43014e+07	4.21918e+07	4.01827e+07
		18	4.67544e+09	1.71716e+08	2.50619e+08	2.82845e+08	2.91771e+08	2.89234e+08	2.8122e+08	2.70749e+08	2.59338e+08	2.47739e+08	2.36323e+08	2.25263e+08	2.14634e+08	2.04463e+08	1.94752e+08	1.85491e+08	1.76664e+08	1.68255e+08	1.60245e+08	1.52615e+08	1.45348e+08	1.38427e+08	1.31835e+08	1.25557e+08	1.19578e+08	1.13884e+08	1.08461e+08	1.03296e+08	9.83774e+07	9.36928e+07	8.92312e+07	8.49821e+07	8.09354e+07	7.70813e+07	7.34108e+07	6.9915e+07	6.65857e+07	6.3415e+07	6.03952e+07	5.75193e+07	5.47802e+07	5.21717e+07	4.96873e+07	4.73212e+07	4.50678e+07	4.29218e+07	4.08779e+07
		19	5.85379e+09	1.75055e+08	2.55306e+08	2.87978e+08	2.96951e+08	2.94291e+08	2.86087e+08	2.75404e+08	2.63777e+08	2.51969e+08	2.40352e+08	2.29099e+08	2.18287e+08	2.07942e+08	1.98065e+08	1.88646e+08	1.79669e+08	1.71117e+08	1.6297e+08	1.5521e+08	1.4782e+08	1.40781e+08	1.34077e+08	1.27693e+08	1.21612e+08	1.15821e+08	1.10306e+08	1.05053e+08	1.00051e+08	9.52862e+07	9.07488e+07	8.64274e+07	8.23118e+07	7.83922e+07	7.46592e+07	7.1104e+07	6.77181e+07	6.44935e+07	6.14223e+07	5.84975e+07	5.57119e+07	5.30589e+07	5.05323e+07	4.8126e+07	4.58343e+07	4.36517e+07	4.15731e+07
		20	7.63396e+09	1.784e+08	2.59998e+08	2.93114e+08	3.02133e+08	2.99349e+08	2.90954e+08	2.80058e+08	2.68216e+08	2.56199e+08	2.4438e+08	2.32935e+08	2.2194e+08	2.11421e+08	2.01378e+08	1.91801e+08	1.82674e+08	1.73978e+08	1.65695e+08	1.57806e+08	1.50292e+08	1.43135e+08	1.36319e+08	1.29828e+08	1.23646e+08	1.17758e+08	1.1215e+08	1.0681e+08	1.01724e+08	9.68796e+07	9.22663e+07	8.78727e+07	8.36883e+07	7.97031e+07	7.59077e+07	7.22931e+07	6.88505e+07	6.5572e+07	6.24495e+07	5.94757e+07	5.66435e+07	5.39462e+07	5.13773e+07	4.89308e+07	4.66008e+07	4.43817e+07	4.22683e+07
	EBITDA diskontiert	Wholesale-only
		Cluster	NPV Capex	1	2	3	4	5	6	7	8	9	10	11	12	13	14	15	16	17	18	19	20	21	22	23	24	25	26	27	28	29	30	31	32	33	34	35	36	37	38	39	40	41	42	43	44	45	46
	NPV	1	1.62066e+09	1.47494e+08	2.12575e+08	2.3834e+08	2.45455e+08	2.43825e+08	2.38194e+08	2.3083e+08	2.22814e+08	2.14658e+08	2.066e+08	1.98749e+08	1.9115e+08	1.8382e+08	1.76761e+08	1.69967e+08	1.63433e+08	1.57148e+08	1.51104e+08	1.45293e+08	1.39705e+08	1.34332e+08	1.29165e+08	1.24197e+08	1.1942e+08	1.14827e+08	1.10411e+08	1.06164e+08	1.02081e+08	9.81549e+07	9.43797e+07	9.07497e+07	8.72593e+07	8.39032e+07	8.06761e+07	7.75732e+07	7.45896e+07	7.17208e+07	6.89623e+07	6.63099e+07	6.37595e+07	6.13072e+07	5.89493e+07	5.6682e+07	5.45019e+07	5.24057e+07	5.03901e+07
		2	1.82232e+09	1.49542e+08	2.15403e+08	2.41412e+08	2.48549e+08	2.46854e+08	2.41126e+08	2.33655e+08	2.25532e+08	2.17271e+08	2.09113e+08	2.01165e+08	1.93473e+08	1.86054e+08	1.78908e+08	1.72032e+08	1.65418e+08	1.59057e+08	1.5294e+08	1.47058e+08	1.41402e+08	1.35963e+08	1.30734e+08	1.25706e+08	1.20871e+08	1.16222e+08	1.11752e+08	1.07454e+08	1.03321e+08	9.9347e+07	9.5526e+07	9.18519e+07	8.83191e+07	8.49223e+07	8.1656e+07	7.85154e+07	7.54956e+07	7.25919e+07	6.97999e+07	6.71153e+07	6.45339e+07	6.20519e+07	5.96652e+07	5.73704e+07	5.51639e+07	5.30422e+07	5.10021e+07
		3	1.93517e+09	1.51592e+08	2.18232e+08	2.44484e+08	2.51644e+08	2.49883e+08	2.44058e+08	2.3648e+08	2.2825e+08	2.19885e+08	2.11625e+08	2.0358e+08	1.95796e+08	1.88287e+08	1.81055e+08	1.74096e+08	1.67403e+08	1.60965e+08	1.54775e+08	1.48822e+08	1.43098e+08	1.37595e+08	1.32303e+08	1.27214e+08	1.22321e+08	1.17617e+08	1.13093e+08	1.08743e+08	1.04561e+08	1.00539e+08	9.66723e+07	9.29541e+07	8.9379e+07	8.59413e+07	8.26359e+07	7.94576e+07	7.64015e+07	7.3463e+07	7.06375e+07	6.79207e+07	6.53083e+07	6.27965e+07	6.03812e+07	5.80589e+07	5.58258e+07	5.36787e+07	5.16141e+07
		4	2.01102e+09	1.53645e+08	2.21064e+08	2.47558e+08	2.54739e+08	2.52913e+08	2.4699e+08	2.39306e+08	2.30968e+08	2.22498e+08	2.14138e+08	2.05996e+08	1.98118e+08	1.9052e+08	1.83202e+08	1.76161e+08	1.69388e+08	1.62874e+08	1.5661e+08	1.50587e+08	1.44795e+08	1.39226e+08	1.33871e+08	1.28723e+08	1.23772e+08	1.19011e+08	1.14434e+08	1.10033e+08	1.05801e+08	1.01731e+08	9.78186e+07	9.40564e+07	9.04388e+07	8.69604e+07	8.36158e+07	8.03998e+07	7.73075e+07	7.43341e+07	7.14751e+07	6.87261e+07	6.60827e+07	6.35411e+07	6.10972e+07	5.87473e+07	5.64878e+07	5.43152e+07	5.22262e+07
		5	2.10168e+09	1.557e+08	2.23897e+08	2.50633e+08	2.57835e+08	2.55942e+08	2.49922e+08	2.42131e+08	2.33686e+08	2.25112e+08	2.16651e+08	2.08412e+08	2.00441e+08	1.92753e+08	1.85349e+08	1.78225e+08	1.71373e+08	1.64783e+08	1.58446e+08	1.52352e+08	1.46492e+08	1.40858e+08	1.3544e+08	1.30231e+08	1.25222e+08	1.20406e+08	1.15775e+08	1.11322e+08	1.0704e+08	1.02924e+08	9.89649e+07	9.51586e+07	9.14986e+07	8.79795e+07	8.45956e+07	8.1342e+07	7.82134e+07	7.52052e+07	7.23127e+07	6.95314e+07	6.68572e+07	6.42857e+07	6.18132e+07	5.94358e+07	5.71498e+07	5.49517e+07	5.28382e+07
		6	2.22193e+09	1.57758e+08	2.26733e+08	2.53709e+08	2.60931e+08	2.58972e+08	2.52854e+08	2.44956e+08	2.36404e+08	2.27725e+08	2.19163e+08	2.10828e+08	2.02763e+08	1.94986e+08	1.87497e+08	1.8029e+08	1.73358e+08	1.66692e+08	1.60281e+08	1.54116e+08	1.48189e+08	1.42489e+08	1.37009e+08	1.3174e+08	1.26673e+08	1.21801e+08	1.17116e+08	1.12612e+08	1.0828e+08	1.04116e+08	1.00111e+08	9.62608e+07	9.25585e+07	8.89985e+07	8.55755e+07	8.22841e+07	7.91194e+07	7.60763e+07	7.31503e+07	7.03368e+07	6.76316e+07	6.50303e+07	6.25292e+07	6.01242e+07	5.78117e+07	5.55882e+07	5.34502e+07
		7	2.31998e+09	1.59818e+08	2.2957e+08	2.56786e+08	2.64028e+08	2.62002e+08	2.55786e+08	2.47782e+08	2.39122e+08	2.30339e+08	2.21676e+08	2.13243e+08	2.05086e+08	1.97219e+08	1.89644e+08	1.82354e+08	1.75343e+08	1.686e+08	1.62116e+08	1.55881e+08	1.49886e+08	1.44121e+08	1.38578e+08	1.33248e+08	1.28123e+08	1.23195e+08	1.18457e+08	1.13901e+08	1.0952e+08	1.05308e+08	1.01258e+08	9.7363e+07	9.36183e+07	9.00176e+07	8.65554e+07	8.32263e+07	8.00253e+07	7.69474e+07	7.39879e+07	7.11422e+07	6.8406e+07	6.5775e+07	6.32452e+07	6.08127e+07	5.84737e+07	5.62247e+07	5.40622e+07
		8	2.51517e+09	1.61881e+08	2.3241e+08	2.59864e+08	2.67125e+08	2.65033e+08	2.58718e+08	2.50607e+08	2.4184e+08	2.32952e+08	2.24189e+08	2.15659e+08	2.07409e+08	1.99452e+08	1.91791e+08	1.84419e+08	1.77328e+08	1.70509e+08	1.63951e+08	1.57646e+08	1.51583e+08	1.45753e+08	1.40147e+08	1.34756e+08	1.29574e+08	1.2459e+08	1.19798e+08	1.1519e+08	1.1076e+08	1.065e+08	1.02404e+08	9.84652e+07	9.46781e+07	9.10367e+07	8.75352e+07	8.41685e+07	8.09313e+07	7.78185e+07	7.48255e+07	7.19476e+07	6.91804e+07	6.65196e+07	6.39611e+07	6.15011e+07	5.91357e+07	5.68612e+07	5.46743e+07
		9	2.62154e+09	1.63946e+08	2.35251e+08	2.62943e+08	2.70223e+08	2.68063e+08	2.61651e+08	2.53432e+08	2.44558e+08	2.35566e+08	2.26701e+08	2.18075e+08	2.09731e+08	2.01685e+08	1.93938e+08	1.86483e+08	1.79313e+08	1.72418e+08	1.65787e+08	1.59411e+08	1.53279e+08	1.47384e+08	1.41716e+08	1.36265e+08	1.31024e+08	1.25985e+08	1.21139e+08	1.1648e+08	1.12e+08	1.07692e+08	1.0355e+08	9.95675e+07	9.5738e+07	9.20557e+07	8.85151e+07	8.51107e+07	8.18372e+07	7.86896e+07	7.56631e+07	7.2753e+07	6.99548e+07	6.72642e+07	6.46771e+07	6.21895e+07	5.97976e+07	5.74977e+07	5.52863e+07
		10	2.82413e+09	1.66013e+08	2.38094e+08	2.66024e+08	2.73321e+08	2.71094e+08	2.64583e+08	2.56258e+08	2.47276e+08	2.38179e+08	2.29214e+08	2.2049e+08	2.12054e+08	2.03918e+08	1.96085e+08	1.88548e+08	1.81298e+08	1.74326e+08	1.67622e+08	1.61175e+08	1.54976e+08	1.49016e+08	1.43284e+08	1.37773e+08	1.32474e+08	1.27379e+08	1.2248e+08	1.17769e+08	1.1324e+08	1.08884e+08	1.04696e+08	1.0067e+08	9.67978e+07	9.30748e+07	8.9495e+07	8.60529e+07	8.27432e+07	7.95607e+07	7.65007e+07	7.35584e+07	7.07292e+07	6.80088e+07	6.53931e+07	6.2878e+07	6.04596e+07	5.81342e+07	5.58983e+07
		11	2.91571e+09	1.68083e+08	2.40939e+08	2.69105e+08	2.7642e+08	2.74125e+08	2.67516e+08	2.59083e+08	2.49994e+08	2.40793e+08	2.31727e+08	2.22906e+08	2.14376e+08	2.06151e+08	1.98232e+08	1.90612e+08	1.83283e+08	1.76235e+08	1.69457e+08	1.6294e+08	1.56673e+08	1.50647e+08	1.44853e+08	1.39282e+08	1.33925e+08	1.28774e+08	1.23821e+08	1.19059e+08	1.1448e+08	1.10077e+08	1.05843e+08	1.01772e+08	9.78576e+07	9.40939e+07	9.04749e+07	8.69951e+07	8.36491e+07	8.04318e+07	7.73383e+07	7.43637e+07	7.15036e+07	6.87535e+07	6.61091e+07	6.35664e+07	6.11216e+07	5.87707e+07	5.65103e+07
		12	3.03781e+09	1.70155e+08	2.43786e+08	2.72188e+08	2.79519e+08	2.77156e+08	2.70448e+08	2.61908e+08	2.52712e+08	2.43406e+08	2.34239e+08	2.25322e+08	2.16699e+08	2.08385e+08	2.00379e+08	1.92677e+08	1.85268e+08	1.78144e+08	1.71293e+08	1.64705e+08	1.5837e+08	1.52279e+08	1.46422e+08	1.4079e+08	1.35375e+08	1.30169e+08	1.25162e+08	1.20348e+08	1.15719e+08	1.11269e+08	1.06989e+08	1.02874e+08	9.89174e+07	9.51129e+07	9.14547e+07	8.79372e+07	8.4555e+07	8.13029e+07	7.81759e+07	7.51691e+07	7.2278e+07	6.94981e+07	6.68251e+07	6.42549e+07	6.17835e+07	5.94073e+07	5.71224e+07
		13	3.21264e+09	1.7223e+08	2.46635e+08	2.75271e+08	2.82619e+08	2.80187e+08	2.73381e+08	2.64734e+08	2.5543e+08	2.46019e+08	2.36752e+08	2.27737e+08	2.19021e+08	2.10618e+08	2.02526e+08	1.94741e+08	1.87254e+08	1.80052e+08	1.73128e+08	1.66469e+08	1.60067e+08	1.5391e+08	1.47991e+08	1.42299e+08	1.36826e+08	1.31563e+08	1.26503e+08	1.21638e+08	1.16959e+08	1.12461e+08	1.08135e+08	1.03976e+08	9.99773e+07	9.6132e+07	9.24346e+07	8.88794e+07	8.5461e+07	8.2174e+07	7.90135e+07	7.59745e+07	7.30524e+07	7.02427e+07	6.75411e+07	6.49433e+07	6.24455e+07	6.00438e+07	5.77344e+07
		14	3.36435e+09	1.74307e+08	2.49486e+08	2.78356e+08	2.85719e+08	2.83219e+08	2.76313e+08	2.67559e+08	2.58148e+08	2.48633e+08	2.39264e+08	2.30153e+08	2.21344e+08	2.12851e+08	2.04674e+08	1.96806e+08	1.89239e+08	1.81961e+08	1.74963e+08	1.68234e+08	1.61764e+08	1.55542e+08	1.4956e+08	1.43807e+08	1.38276e+08	1.32958e+08	1.27844e+08	1.22927e+08	1.18199e+08	1.13653e+08	1.09282e+08	1.05079e+08	1.01037e+08	9.71511e+07	9.34145e+07	8.98216e+07	8.63669e+07	8.30451e+07	7.98511e+07	7.67799e+07	7.38268e+07	7.09873e+07	6.8257e+07	6.56318e+07	6.31075e+07	6.06803e+07	5.83464e+07
		15	3.44112e+09	1.76386e+08	2.52338e+08	2.81441e+08	2.8882e+08	2.8625e+08	2.79246e+08	2.70384e+08	2.60866e+08	2.51246e+08	2.41777e+08	2.32569e+08	2.23666e+08	2.15084e+08	2.06821e+08	1.9887e+08	1.91224e+08	1.8387e+08	1.76798e+08	1.69999e+08	1.6346e+08	1.57173e+08	1.51128e+08	1.45316e+08	1.39727e+08	1.34353e+08	1.29185e+08	1.24217e+08	1.19439e+08	1.14845e+08	1.10428e+08	1.06181e+08	1.02097e+08	9.81701e+07	9.43944e+07	9.07638e+07	8.72729e+07	8.39162e+07	8.06887e+07	7.75853e+07	7.46012e+07	7.1732e+07	6.8973e+07	6.63202e+07	6.37694e+07	6.13168e+07	5.89584e+07
		16	3.62428e+09	1.78467e+08	2.55192e+08	2.84528e+08	2.91921e+08	2.89282e+08	2.82179e+08	2.7321e+08	2.63584e+08	2.5386e+08	2.44289e+08	2.34984e+08	2.25989e+08	2.17317e+08	2.08968e+08	2.00935e+08	1.93209e+08	1.85779e+08	1.78634e+08	1.71763e+08	1.65157e+08	1.58805e+08	1.52697e+08	1.46824e+08	1.41177e+08	1.35747e+08	1.30526e+08	1.25506e+08	1.20679e+08	1.16037e+08	1.11574e+08	1.07283e+08	1.03157e+08	9.91892e+07	9.53742e+07	9.1706e+07	8.81788e+07	8.47873e+07	8.15263e+07	7.83907e+07	7.53756e+07	7.24766e+07	6.9689e+07	6.70087e+07	6.44314e+07	6.19533e+07	5.95705e+07
		17	3.82594e+09	1.8055e+08	2.58048e+08	2.87615e+08	2.95023e+08	2.92314e+08	2.85111e+08	2.76035e+08	2.66302e+08	2.56473e+08	2.46802e+08	2.374e+08	2.28311e+08	2.1955e+08	2.11115e+08	2.02999e+08	1.95194e+08	1.87687e+08	1.80469e+08	1.73528e+08	1.66854e+08	1.60437e+08	1.54266e+08	1.48333e+08	1.42628e+08	1.37142e+08	1.31867e+08	1.26795e+08	1.21919e+08	1.17229e+08	1.12721e+08	1.08385e+08	1.04217e+08	1.00208e+08	9.63541e+07	9.26482e+07	8.90848e+07	8.56584e+07	8.23639e+07	7.9196e+07	7.615e+07	7.32212e+07	7.0405e+07	6.76971e+07	6.50934e+07	6.25898e+07	6.01825e+07
		18	4.78612e+09	1.82636e+08	2.60905e+08	2.90703e+08	2.98125e+08	2.95346e+08	2.88044e+08	2.7886e+08	2.6902e+08	2.59086e+08	2.49314e+08	2.39815e+08	2.30634e+08	2.21783e+08	2.13262e+08	2.05064e+08	1.97179e+08	1.89596e+08	1.82304e+08	1.75293e+08	1.68551e+08	1.62068e+08	1.55835e+08	1.49841e+08	1.44078e+08	1.38537e+08	1.33208e+08	1.28085e+08	1.23159e+08	1.18422e+08	1.13867e+08	1.09487e+08	1.05276e+08	1.01227e+08	9.7334e+07	9.35904e+07	8.99907e+07	8.65295e+07	8.32015e+07	8.00014e+07	7.69244e+07	7.39658e+07	7.1121e+07	6.83856e+07	6.57553e+07	6.32263e+07	6.07945e+07
		19	5.99237e+09	1.84724e+08	2.63764e+08	2.93793e+08	3.01228e+08	2.98379e+08	2.90977e+08	2.81686e+08	2.71738e+08	2.61699e+08	2.51827e+08	2.42231e+08	2.32956e+08	2.24016e+08	2.15409e+08	2.07128e+08	1.99164e+08	1.91505e+08	1.8414e+08	1.77057e+08	1.70248e+08	1.637e+08	1.57404e+08	1.5135e+08	1.45528e+08	1.39931e+08	1.34549e+08	1.29374e+08	1.24398e+08	1.19614e+08	1.15013e+08	1.1059e+08	1.06336e+08	1.02246e+08	9.83138e+07	9.45325e+07	9.08967e+07	8.74006e+07	8.40391e+07	8.08068e+07	7.76989e+07	7.47104e+07	7.1837e+07	6.9074e+07	6.64173e+07	6.38628e+07	6.14065e+07
		20	7.81468e+09	1.86814e+08	2.66625e+08	2.96883e+08	3.04331e+08	3.01411e+08	2.9391e+08	2.84511e+08	2.74456e+08	2.64313e+08	2.54339e+08	2.44647e+08	2.35279e+08	2.26249e+08	2.17556e+08	2.09193e+08	2.01149e+08	1.93413e+08	1.85975e+08	1.78822e+08	1.71944e+08	1.65331e+08	1.58972e+08	1.52858e+08	1.46979e+08	1.41326e+08	1.3589e+08	1.30664e+08	1.25638e+08	1.20806e+08	1.1616e+08	1.11692e+08	1.07396e+08	1.03265e+08	9.92937e+07	9.54747e+07	9.18026e+07	8.82717e+07	8.48767e+07	8.16122e+07	7.84733e+07	7.54551e+07	7.25529e+07	6.97624e+07	6.70793e+07	6.44993e+07	6.20186e+07
	NPV	Integriert
		Cluster	NPV Capex	1	2	3	4	5	6	7	8	9	10	11	12	13	14	15	16	17	18	19	20	21	22	23	24	25	26	27	28	29	30	31	32	33	34	35	36	37	38	39	40	41	42	43	44	45	46
	NPV	1	1.58318e+09	-1.46717e+09	-1.29529e+09	-1.0991e+09	-8.95054e+08	-6.91628e+08	-4.93073e+08	-3.01424e+08	-1.17553e+08	5.82766e+07	2.26111e+08	3.86153e+08	5.3868e+08	6.84e+08	8.22429e+08	9.54283e+08	1.07987e+09	1.19947e+09	1.31339e+09	1.42188e+09	1.5252e+09	1.62361e+09	1.71733e+09	1.80658e+09	1.89159e+09	1.97255e+09	2.04965e+09	2.12308e+09	2.19302e+09	2.25962e+09	2.32306e+09	2.38347e+09	2.441e+09	2.4958e+09	2.54799e+09	2.59769e+09	2.64502e+09	2.6901e+09	2.73304e+09	2.77393e+09	2.81287e+09	2.84996e+09	2.88528e+09	2.91892e+09	2.95096e+09	2.98147e+09	3.01053e+09
		2	1.78017e+09	-1.66095e+09	-1.48449e+09	-1.28324e+09	-1.07406e+09	-8.65594e+08	-6.62181e+08	-4.6588e+08	-2.7757e+08	-9.75097e+07	7.4354e+07	2.38233e+08	3.94414e+08	5.43213e+08	6.84956e+08	8.19964e+08	9.48552e+08	1.07102e+09	1.18766e+09	1.29875e+09	1.40454e+09	1.5053e+09	1.60126e+09	1.69266e+09	1.7797e+09	1.86259e+09	1.94154e+09	2.01673e+09	2.08834e+09	2.15653e+09	2.22148e+09	2.28334e+09	2.34225e+09	2.39836e+09	2.4518e+09	2.50269e+09	2.55115e+09	2.59731e+09	2.64127e+09	2.68314e+09	2.72302e+09	2.76099e+09	2.79716e+09	2.8316e+09	2.86441e+09	2.89565e+09	2.9254e+09
		3	1.89042e+09	-1.76797e+09	-1.58693e+09	-1.38061e+09	-1.16629e+09	-9.52784e+08	-7.44512e+08	-5.43559e+08	-3.50809e+08	-1.66519e+08	9.37368e+06	1.7709e+08	3.36924e+08	4.89202e+08	6.34258e+08	7.72422e+08	9.04014e+08	1.02934e+09	1.14871e+09	1.26239e+09	1.37066e+09	1.47377e+09	1.57198e+09	1.6655e+09	1.75458e+09	1.83941e+09	1.9202e+09	1.99715e+09	2.07043e+09	2.14022e+09	2.20669e+09	2.26999e+09	2.33028e+09	2.3877e+09	2.44238e+09	2.49446e+09	2.54406e+09	2.5913e+09	2.63629e+09	2.67913e+09	2.71994e+09	2.7588e+09	2.79581e+09	2.83106e+09	2.86463e+09	2.89661e+09	2.92706e+09
		4	1.96452e+09	-1.83884e+09	-1.6532e+09	-1.44182e+09	-1.22235e+09	-1.0038e+09	-7.90671e+08	-5.85066e+08	-3.87877e+08	-1.99357e+08	-1.94345e+07	1.52118e+08	3.15606e+08	4.71364e+08	6.19733e+08	7.61052e+08	8.95649e+08	1.02384e+09	1.14593e+09	1.26221e+09	1.37295e+09	1.47842e+09	1.57886e+09	1.67453e+09	1.76563e+09	1.8524e+09	1.93504e+09	2.01374e+09	2.08869e+09	2.16008e+09	2.22807e+09	2.29281e+09	2.35448e+09	2.41321e+09	2.46914e+09	2.52241e+09	2.57314e+09	2.62146e+09	2.66747e+09	2.7113e+09	2.75303e+09	2.79278e+09	2.83064e+09	2.86669e+09	2.90103e+09	2.93373e+09	2.96488e+09
		5	2.05307e+09	-1.92415e+09	-1.73392e+09	-1.51746e+09	-1.29284e+09	-1.06925e+09	-8.51262e+08	-6.41005e+08	-4.39377e+08	-2.46626e+08	-6.26753e+07	1.12714e+08	2.79856e+08	4.39092e+08	5.90775e+08	7.35249e+08	8.72851e+08	1.0039e+09	1.12872e+09	1.24759e+09	1.36081e+09	1.46863e+09	1.57132e+09	1.66911e+09	1.76225e+09	1.85096e+09	1.93544e+09	2.0159e+09	2.09253e+09	2.16551e+09	2.23501e+09	2.3012e+09	2.36424e+09	2.42428e+09	2.48146e+09	2.53592e+09	2.58779e+09	2.63718e+09	2.68422e+09	2.72903e+09	2.77169e+09	2.81233e+09	2.85103e+09	2.88789e+09	2.923e+09	2.95643e+09	2.98827e+09
		6	2.17055e+09	-2.03838e+09	-1.84354e+09	-1.622e+09	-1.39223e+09	-1.1636e+09	-9.40745e+08	-7.25836e+08	-5.19769e+08	-3.22788e+08	-1.34808e+08	4.44186e+07	2.15214e+08	3.77929e+08	5.32925e+08	6.80554e+08	8.21161e+08	9.55077e+08	1.08262e+09	1.20409e+09	1.31977e+09	1.42995e+09	1.53488e+09	1.63481e+09	1.72998e+09	1.82063e+09	1.90695e+09	1.98917e+09	2.06747e+09	2.14204e+09	2.21306e+09	2.2807e+09	2.34512e+09	2.40647e+09	2.4649e+09	2.52054e+09	2.57354e+09	2.62401e+09	2.67208e+09	2.71786e+09	2.76146e+09	2.80299e+09	2.84254e+09	2.8802e+09	2.91607e+09	2.95023e+09	2.98277e+09
		7	2.26633e+09	-2.13091e+09	-1.93146e+09	-1.70483e+09	-1.4699e+09	-1.23623e+09	-1.00852e+09	-7.88955e+08	-5.78448e+08	-3.77237e+08	-1.85228e+08	-2.16545e+06	1.72283e+08	3.38478e+08	4.96786e+08	6.47571e+08	7.91183e+08	9.2796e+08	1.05823e+09	1.18229e+09	1.30045e+09	1.41298e+09	1.52015e+09	1.62222e+09	1.71943e+09	1.812e+09	1.90018e+09	1.98415e+09	2.06412e+09	2.14029e+09	2.21282e+09	2.28191e+09	2.3477e+09	2.41036e+09	2.47004e+09	2.52688e+09	2.58101e+09	2.63256e+09	2.68166e+09	2.72841e+09	2.77295e+09	2.81536e+09	2.85575e+09	2.89422e+09	2.93086e+09	2.96575e+09	2.99898e+09
		8	2.457e+09	-2.31831e+09	-2.11424e+09	-1.88252e+09	-1.64244e+09	-1.40372e+09	-1.17115e+09	-9.46933e+08	-7.31987e+08	-5.26546e+08	-3.30508e+08	-1.43608e+08	3.44935e+07	2.04167e+08	3.65789e+08	5.19729e+08	6.66345e+08	8.05984e+08	9.38975e+08	1.06563e+09	1.18626e+09	1.30115e+09	1.41056e+09	1.51477e+09	1.61401e+09	1.70852e+09	1.79854e+09	1.88427e+09	1.96591e+09	2.04367e+09	2.11773e+09	2.18826e+09	2.25543e+09	2.3194e+09	2.38033e+09	2.43835e+09	2.49361e+09	2.54624e+09	2.59637e+09	2.64411e+09	2.68957e+09	2.73287e+09	2.77411e+09	2.81338e+09	2.85078e+09	2.8864e+09	2.92033e+09
		9	2.56092e+09	-2.41896e+09	-2.21026e+09	-1.97345e+09	-1.72821e+09	-1.48444e+09	-1.247e+09	-1.01814e+09	-7.98753e+08	-5.89081e+08	-3.89015e+08	-1.98279e+08	-1.65235e+07	1.56629e+08	3.21564e+08	4.78659e+08	6.2828e+08	7.70781e+08	9.06497e+08	1.03575e+09	1.15885e+09	1.27609e+09	1.38775e+09	1.49409e+09	1.59536e+09	1.69182e+09	1.78368e+09	1.87116e+09	1.95448e+09	2.03383e+09	2.10941e+09	2.18138e+09	2.24993e+09	2.31521e+09	2.37739e+09	2.4366e+09	2.49299e+09	2.5467e+09	2.59785e+09	2.64657e+09	2.69296e+09	2.73715e+09	2.77923e+09	2.81931e+09	2.85748e+09	2.89383e+09	2.92845e+09
		10	2.75882e+09	-2.61358e+09	-2.40025e+09	-2.15834e+09	-1.90793e+09	-1.65912e+09	-1.41682e+09	-1.1833e+09	-9.59474e+08	-7.45573e+08	-5.41478e+08	-3.46905e+08	-1.61497e+08	1.5135e+07	1.83383e+08	3.43633e+08	4.96259e+08	6.41621e+08	7.80063e+08	9.11914e+08	1.03749e+09	1.15708e+09	1.27098e+09	1.37945e+09	1.48276e+09	1.58115e+09	1.67486e+09	1.7641e+09	1.84909e+09	1.93004e+09	2.00713e+09	2.08055e+09	2.15047e+09	2.21706e+09	2.28049e+09	2.34089e+09	2.39842e+09	2.4532e+09	2.50538e+09	2.55508e+09	2.6024e+09	2.64748e+09	2.6904e+09	2.73129e+09	2.77022e+09	2.8073e+09	2.84262e+09
		11	2.84828e+09	-2.69976e+09	-2.48178e+09	-2.23477e+09	-1.9792e+09	-1.72534e+09	-1.47817e+09	-1.24e+09	-1.01174e+09	-7.93606e+08	-5.85482e+08	-3.87073e+08	-1.98012e+08	-1.79007e+07	1.5366e+08	3.17065e+08	4.72696e+08	6.2092e+08	7.62087e+08	8.96533e+08	1.02458e+09	1.14652e+09	1.26267e+09	1.37328e+09	1.47862e+09	1.57894e+09	1.67449e+09	1.76549e+09	1.85216e+09	1.9347e+09	2.01331e+09	2.08817e+09	2.15947e+09	2.22738e+09	2.29205e+09	2.35364e+09	2.4123e+09	2.46816e+09	2.52137e+09	2.57204e+09	2.6203e+09	2.66626e+09	2.71003e+09	2.75172e+09	2.79142e+09	2.82924e+09	2.86525e+09
		12	2.96756e+09	-2.81574e+09	-2.59313e+09	-2.341e+09	-2.08027e+09	-1.82136e+09	-1.56933e+09	-1.3265e+09	-1.0938e+09	-8.71438e+08	-6.59286e+08	-4.5704e+08	-2.64325e+08	-8.07354e+07	9.41385e+07	2.60699e+08	4.19335e+08	5.7042e+08	7.14313e+08	8.51354e+08	9.8187e+08	1.10617e+09	1.22455e+09	1.3373e+09	1.44468e+09	1.54694e+09	1.64433e+09	1.73709e+09	1.82543e+09	1.90956e+09	1.98969e+09	2.066e+09	2.13867e+09	2.20789e+09	2.27381e+09	2.33659e+09	2.39638e+09	2.45333e+09	2.50756e+09	2.55921e+09	2.6084e+09	2.65525e+09	2.69986e+09	2.74236e+09	2.78282e+09	2.82137e+09	2.85807e+09
		13	3.13835e+09	-2.98323e+09	-2.75596e+09	-2.49873e+09	-2.23283e+09	-1.96886e+09	-1.71197e+09	-1.46449e+09	-1.22735e+09	-1.00076e+09	-7.84576e+08	-5.78494e+08	-3.82126e+08	-1.95057e+08	-1.687e+07	1.52845e+08	3.14486e+08	4.68433e+08	6.15051e+08	7.54688e+08	8.87676e+08	1.01433e+09	1.13496e+09	1.24984e+09	1.35925e+09	1.46345e+09	1.56269e+09	1.6572e+09	1.74721e+09	1.83294e+09	1.91458e+09	1.99234e+09	2.06639e+09	2.13692e+09	2.20408e+09	2.26805e+09	2.32898e+09	2.387e+09	2.44226e+09	2.49489e+09	2.54501e+09	2.59274e+09	2.63821e+09	2.6815e+09	2.72274e+09	2.76201e+09	2.79941e+09
		14	3.28654e+09	-3.12812e+09	-2.89619e+09	-2.63384e+09	-2.36277e+09	-2.09376e+09	-1.832e+09	-1.57987e+09	-1.33828e+09	-1.10746e+09	-8.87255e+08	-6.77336e+08	-4.77315e+08	-2.86767e+08	-1.05267e+08	6.76031e+07	2.32248e+08	3.89057e+08	5.384e+08	6.80633e+08	8.16093e+08	9.45103e+08	1.06797e+09	1.18499e+09	1.29643e+09	1.40257e+09	1.50365e+09	1.59992e+09	1.6916e+09	1.77892e+09	1.86208e+09	1.94128e+09	2.01671e+09	2.08855e+09	2.15697e+09	2.22213e+09	2.28418e+09	2.34328e+09	2.39957e+09	2.45318e+09	2.50423e+09	2.55285e+09	2.59916e+09	2.64326e+09	2.68527e+09	2.72527e+09	2.76336e+09
		15	3.36155e+09	-3.19981e+09	-2.96322e+09	-2.69575e+09	-2.41951e+09	-2.14544e+09	-1.87881e+09	-1.62203e+09	-1.37601e+09	-1.14096e+09	-9.16719e+08	-7.02964e+08	-4.9929e+08	-3.05263e+08	-1.2045e+08	5.55755e+07	2.23226e+08	3.82896e+08	5.34964e+08	6.79793e+08	8.17725e+08	9.49089e+08	1.0742e+09	1.19335e+09	1.30683e+09	1.4149e+09	1.51783e+09	1.61585e+09	1.70921e+09	1.79812e+09	1.8828e+09	1.96345e+09	2.04026e+09	2.1134e+09	2.18307e+09	2.24942e+09	2.31261e+09	2.37279e+09	2.4301e+09	2.48468e+09	2.53667e+09	2.58618e+09	2.63333e+09	2.67824e+09	2.72101e+09	2.76174e+09	2.80053e+09
		16	3.54047e+09	-3.37541e+09	-3.13415e+09	-2.86156e+09	-2.58014e+09	-2.30102e+09	-2.02953e+09	-1.76809e+09	-1.51763e+09	-1.27835e+09	-1.05008e+09	-8.32491e+08	-6.25164e+08	-4.27658e+08	-2.39532e+08	-6.03516e+07	1.10303e+08	2.72835e+08	4.27629e+08	5.75053e+08	7.15457e+08	8.49175e+08	9.76526e+08	1.09781e+09	1.21332e+09	1.32333e+09	1.42811e+09	1.52789e+09	1.62292e+09	1.71343e+09	1.79962e+09	1.88171e+09	1.9599e+09	2.03436e+09	2.10527e+09	2.17281e+09	2.23713e+09	2.29839e+09	2.35673e+09	2.41229e+09	2.46521e+09	2.5156e+09	2.5636e+09	2.60931e+09	2.65285e+09	2.69431e+09	2.7338e+09
		17	3.73746e+09	-3.56908e+09	-3.32314e+09	-3.04542e+09	-2.75883e+09	-2.47465e+09	-2.1983e+09	-1.9322e+09	-1.6773e+09	-1.43379e+09	-1.2015e+09	-9.80073e+08	-7.69092e+08	-5.68107e+08	-3.76668e+08	-1.94333e+08	-2.06731e+07	1.4472e+08	3.0224e+08	4.52259e+08	5.95135e+08	7.31207e+08	8.608e+08	9.84222e+08	1.10177e+09	1.21371e+09	1.32033e+09	1.42187e+09	1.51857e+09	1.61067e+09	1.69839e+09	1.78192e+09	1.86148e+09	1.93725e+09	2.00942e+09	2.07814e+09	2.1436e+09	2.20593e+09	2.2653e+09	2.32184e+09	2.37569e+09	2.42697e+09	2.47582e+09	2.52233e+09	2.56663e+09	2.60883e+09	2.64901e+09
		18	4.67544e+09	-4.50372e+09	-4.2531e+09	-3.97026e+09	-3.67849e+09	-3.38925e+09	-3.10803e+09	-2.83728e+09	-2.57795e+09	-2.33021e+09	-2.09388e+09	-1.86862e+09	-1.65399e+09	-1.44952e+09	-1.25477e+09	-1.06928e+09	-8.92617e+08	-7.24362e+08	-5.64117e+08	-4.11502e+08	-2.66155e+08	-1.27728e+08	4.10719e+06	1.29664e+08	2.49243e+08	3.63127e+08	4.71588e+08	5.74884e+08	6.73262e+08	7.66955e+08	8.56186e+08	9.41168e+08	1.0221e+09	1.09918e+09	1.1726e+09	1.24251e+09	1.3091e+09	1.37251e+09	1.43291e+09	1.49043e+09	1.54521e+09	1.59738e+09	1.64706e+09	1.69439e+09	1.73945e+09	1.78238e+09	1.82325e+09
		19	5.85379e+09	-5.67873e+09	-5.42343e+09	-5.13545e+09	-4.8385e+09	-4.54421e+09	-4.25812e+09	-3.98272e+09	-3.71894e+09	-3.46697e+09	-3.22662e+09	-2.99752e+09	-2.77923e+09	-2.57129e+09	-2.37323e+09	-2.18458e+09	-2.00491e+09	-1.83379e+09	-1.67082e+09	-1.51561e+09	-1.36779e+09	-1.22701e+09	-1.09294e+09	-9.65244e+08	-8.43632e+08	-7.27811e+08	-6.17505e+08	-5.12452e+08	-4.12402e+08	-3.17115e+08	-2.26367e+08	-1.39939e+08	-5.76273e+07	2.07649e+07	9.54242e+07	1.66528e+08	2.34246e+08	2.9874e+08	3.60162e+08	4.1866e+08	4.74372e+08	5.2743e+08	5.77963e+08	6.26089e+08	6.71923e+08	7.15575e+08	7.57148e+08
		20	7.63396e+09	-7.45556e+09	-7.19556e+09	-6.90245e+09	-6.60032e+09	-6.30097e+09	-6.01001e+09	-5.72996e+09	-5.46174e+09	-5.20554e+09	-4.96116e+09	-4.72823e+09	-4.50629e+09	-4.29487e+09	-4.09349e+09	-3.90169e+09	-3.71901e+09	-3.54503e+09	-3.37934e+09	-3.22153e+09	-3.07124e+09	-2.92811e+09	-2.79179e+09	-2.66196e+09	-2.53831e+09	-2.42056e+09	-2.30841e+09	-2.2016e+09	-2.09987e+09	-2.00299e+09	-1.91073e+09	-1.82285e+09	-1.73917e+09	-1.65946e+09	-1.58355e+09	-1.51126e+09	-1.44241e+09	-1.37684e+09	-1.31439e+09	-1.25491e+09	-1.19827e+09	-1.14432e+09	-1.09295e+09	-1.04402e+09	-9.97415e+08	-9.53034e+08	-9.10765e+08
	NPV	wholesale-only
		Cluster	NPV Capex	1	2	3	4	5	6	7	8	9	10	11	12	13	14	15	16	17	18	19	20	21	22	23	24	25	26	27	28	29	30	31	32	33	34	35	36	37	38	39	40	41	42	43	44	45	46
	NPV	1	1.62066e+09	-1.47316e+09	-1.26059e+09	-1.02225e+09	-7.76794e+08	-5.32969e+08	-2.94775e+08	-6.39457e+07	1.58868e+08	3.73526e+08	5.80126e+08	7.78875e+08	9.70025e+08	1.15385e+09	1.33061e+09	1.50057e+09	1.66401e+09	1.82115e+09	1.97226e+09	2.11755e+09	2.25726e+09	2.39159e+09	2.52075e+09	2.64495e+09	2.76437e+09	2.8792e+09	2.98961e+09	3.09577e+09	3.19785e+09	3.29601e+09	3.39039e+09	3.48114e+09	3.5684e+09	3.6523e+09	3.73298e+09	3.81055e+09	3.88514e+09	3.95686e+09	4.02582e+09	4.09213e+09	4.15589e+09	4.2172e+09	4.27615e+09	4.33283e+09	4.38733e+09	4.43974e+09	4.49013e+09
		2	1.82232e+09	-1.67277e+09	-1.45737e+09	-1.21596e+09	-9.67411e+08	-7.20557e+08	-4.79431e+08	-2.45776e+08	-2.02445e+07	1.97027e+08	4.06139e+08	6.07304e+08	8.00777e+08	9.86831e+08	1.16574e+09	1.33777e+09	1.50319e+09	1.66225e+09	1.81518e+09	1.96224e+09	2.10364e+09	2.23961e+09	2.37034e+09	2.49605e+09	2.61692e+09	2.73314e+09	2.84489e+09	2.95235e+09	3.05567e+09	3.15501e+09	3.25054e+09	3.34239e+09	3.43071e+09	3.51563e+09	3.59729e+09	3.6758e+09	3.7513e+09	3.82389e+09	3.89369e+09	3.96081e+09	4.02534e+09	4.08739e+09	4.14706e+09	4.20443e+09	4.25959e+09	4.31263e+09	4.36364e+09
		3	1.93517e+09	-1.78358e+09	-1.56535e+09	-1.32086e+09	-1.06922e+09	-8.19335e+08	-5.75278e+08	-3.38797e+08	-1.10547e+08	1.09338e+08	3.20963e+08	5.24544e+08	7.20339e+08	9.08626e+08	1.08968e+09	1.26378e+09	1.43118e+09	1.59215e+09	1.74692e+09	1.89574e+09	2.03884e+09	2.17644e+09	2.30874e+09	2.43595e+09	2.55827e+09	2.67589e+09	2.78898e+09	2.89773e+09	3.00229e+09	3.10283e+09	3.1995e+09	3.29245e+09	3.38183e+09	3.46777e+09	3.55041e+09	3.62987e+09	3.70627e+09	3.77973e+09	3.85037e+09	3.91829e+09	3.9836e+09	4.04639e+09	4.10678e+09	4.16483e+09	4.22066e+09	4.27434e+09	4.32595e+09
		4	2.01102e+09	-1.85738e+09	-1.63631e+09	-1.38876e+09	-1.13402e+09	-8.81105e+08	-6.34116e+08	-3.9481e+08	-1.63842e+08	5.86565e+07	2.72795e+08	4.78791e+08	6.76909e+08	8.67429e+08	1.05063e+09	1.22679e+09	1.39618e+09	1.55905e+09	1.71566e+09	1.86625e+09	2.01105e+09	2.15027e+09	2.28414e+09	2.41287e+09	2.53664e+09	2.65565e+09	2.77008e+09	2.88012e+09	2.98592e+09	3.08765e+09	3.18547e+09	3.27952e+09	3.36996e+09	3.45692e+09	3.54054e+09	3.62094e+09	3.69825e+09	3.77258e+09	3.84406e+09	3.91278e+09	3.97886e+09	4.0424e+09	4.1035e+09	4.16225e+09	4.21874e+09	4.27305e+09	4.32528e+09
		5	2.10168e+09	-1.94598e+09	-1.72208e+09	-1.47145e+09	-1.21361e+09	-9.57669e+08	-7.07748e+08	-4.65617e+08	-2.3193e+08	-6.81858e+06	2.09832e+08	4.18244e+08	6.18685e+08	8.11438e+08	9.96787e+08	1.17501e+09	1.34639e+09	1.51117e+09	1.66961e+09	1.82197e+09	1.96846e+09	2.10932e+09	2.24476e+09	2.37499e+09	2.50021e+09	2.62062e+09	2.73639e+09	2.84771e+09	2.95475e+09	3.05768e+09	3.15664e+09	3.2518e+09	3.3433e+09	3.43128e+09	3.51587e+09	3.59722e+09	3.67543e+09	3.75063e+09	3.82295e+09	3.89248e+09	3.95934e+09	4.02362e+09	4.08543e+09	4.14487e+09	4.20202e+09	4.25697e+09	4.30981e+09
		6	2.22193e+09	-2.06417e+09	-1.83744e+09	-1.58373e+09	-1.3228e+09	-1.06383e+09	-8.10974e+08	-5.66018e+08	-3.29614e+08	-1.01888e+08	1.17275e+08	3.28103e+08	5.30866e+08	7.25852e+08	9.13349e+08	1.09364e+09	1.267e+09	1.43369e+09	1.59397e+09	1.74809e+09	1.89627e+09	2.03876e+09	2.17577e+09	2.30751e+09	2.43419e+09	2.55599e+09	2.6731e+09	2.78571e+09	2.89399e+09	2.99811e+09	3.09822e+09	3.19448e+09	3.28704e+09	3.37604e+09	3.46161e+09	3.5439e+09	3.62302e+09	3.69909e+09	3.77224e+09	3.84258e+09	3.91021e+09	3.97524e+09	4.03777e+09	4.0979e+09	4.15571e+09	4.2113e+09	4.26475e+09
		7	2.31998e+09	-2.16017e+09	-1.9306e+09	-1.67381e+09	-1.40978e+09	-1.14778e+09	-8.91994e+08	-6.44212e+08	-4.0509e+08	-1.74751e+08	4.69251e+07	2.60168e+08	4.65254e+08	6.62474e+08	8.52117e+08	1.03447e+09	1.20981e+09	1.37842e+09	1.54053e+09	1.69641e+09	1.8463e+09	1.99042e+09	2.129e+09	2.26225e+09	2.39037e+09	2.51356e+09	2.63202e+09	2.74592e+09	2.85544e+09	2.96075e+09	3.06201e+09	3.15937e+09	3.25299e+09	3.34301e+09	3.42956e+09	3.51279e+09	3.59281e+09	3.66976e+09	3.74375e+09	3.81489e+09	3.8833e+09	3.94907e+09	4.01232e+09	4.07313e+09	4.1316e+09	4.18783e+09	4.24189e+09
		8	2.51517e+09	-2.35329e+09	-2.12088e+09	-1.86101e+09	-1.59389e+09	-1.32885e+09	-1.07014e+09	-8.19529e+08	-5.77688e+08	-3.44736e+08	-1.20547e+08	9.51119e+07	3.0252e+08	5.01973e+08	6.93764e+08	8.78183e+08	1.05551e+09	1.22602e+09	1.38997e+09	1.54762e+09	1.6992e+09	1.84495e+09	1.9851e+09	2.11986e+09	2.24943e+09	2.37402e+09	2.49382e+09	2.60901e+09	2.71977e+09	2.82627e+09	2.92867e+09	3.02714e+09	3.12181e+09	3.21285e+09	3.30039e+09	3.38455e+09	3.46549e+09	3.5433e+09	3.61813e+09	3.69008e+09	3.75926e+09	3.82578e+09	3.88974e+09	3.95124e+09	4.01038e+09	4.06724e+09	4.12191e+09
		9	2.62154e+09	-2.4576e+09	-2.22235e+09	-1.9594e+09	-1.68918e+09	-1.42112e+09	-1.15947e+09	-9.06036e+08	-6.61477e+08	-4.25911e+08	-1.9921e+08	1.88647e+07	2.28596e+08	4.30281e+08	6.24219e+08	8.10703e+08	9.90016e+08	1.16243e+09	1.32822e+09	1.48763e+09	1.64091e+09	1.78829e+09	1.93001e+09	2.06627e+09	2.1973e+09	2.32328e+09	2.44442e+09	2.5609e+09	2.6729e+09	2.78059e+09	2.88414e+09	2.98371e+09	3.07945e+09	3.17151e+09	3.26002e+09	3.34513e+09	3.42697e+09	3.50566e+09	3.58132e+09	3.65407e+09	3.72403e+09	3.79129e+09	3.85597e+09	3.91816e+09	3.97796e+09	4.03546e+09	4.09074e+09
		10	2.82413e+09	-2.65811e+09	-2.42002e+09	-2.154e+09	-1.88067e+09	-1.60958e+09	-1.345e+09	-1.08874e+09	-8.41464e+08	-6.03284e+08	-3.7407e+08	-1.5358e+08	5.84737e+07	2.62392e+08	4.58477e+08	6.47025e+08	8.28324e+08	1.00265e+09	1.17027e+09	1.33145e+09	1.48642e+09	1.63544e+09	1.77872e+09	1.9165e+09	2.04897e+09	2.17635e+09	2.29883e+09	2.4166e+09	2.52984e+09	2.63872e+09	2.74342e+09	2.84409e+09	2.94089e+09	3.03396e+09	3.12346e+09	3.20951e+09	3.29225e+09	3.37181e+09	3.44832e+09	3.52187e+09	3.5926e+09	3.66061e+09	3.726e+09	3.78888e+09	3.84934e+09	3.90748e+09	3.96337e+09
		11	2.91571e+09	-2.74762e+09	-2.50668e+09	-2.23758e+09	-1.96116e+09	-1.68703e+09	-1.41952e+09	-1.16043e+09	-9.1044e+08	-6.69647e+08	-4.37921e+08	-2.15015e+08	-638445	2.05513e+08	4.03745e+08	5.94358e+08	7.77641e+08	9.53876e+08	1.12333e+09	1.28627e+09	1.44295e+09	1.59359e+09	1.73845e+09	1.87773e+09	2.01165e+09	2.14043e+09	2.26425e+09	2.38331e+09	2.49779e+09	2.60786e+09	2.71371e+09	2.81548e+09	2.91334e+09	3.00743e+09	3.0979e+09	3.1849e+09	3.26855e+09	3.34898e+09	3.42632e+09	3.50068e+09	3.57219e+09	3.64094e+09	3.70705e+09	3.77062e+09	3.83174e+09	3.89051e+09	3.94702e+09
		12	3.03781e+09	-2.86765e+09	-2.62387e+09	-2.35168e+09	-2.07216e+09	-1.79501e+09	-1.52456e+09	-1.26265e+09	-1.00994e+09	-7.6653e+08	-5.32291e+08	-3.0697e+08	-9.02708e+07	1.18114e+08	3.18493e+08	5.1117e+08	6.96439e+08	8.74582e+08	1.04587e+09	1.21058e+09	1.36895e+09	1.52123e+09	1.66765e+09	1.80844e+09	1.94382e+09	2.07398e+09	2.19915e+09	2.31949e+09	2.43521e+09	2.54648e+09	2.65347e+09	2.75635e+09	2.85526e+09	2.95038e+09	3.04183e+09	3.12977e+09	3.21432e+09	3.29563e+09	3.3738e+09	3.44897e+09	3.52125e+09	3.59075e+09	3.65757e+09	3.72183e+09	3.78361e+09	3.84302e+09	3.90014e+09
		13	3.21264e+09	-3.04041e+09	-2.79378e+09	-2.5185e+09	-2.23589e+09	-1.9557e+09	-1.68232e+09	-1.41758e+09	-1.16215e+09	-9.16135e+08	-6.79383e+08	-4.51646e+08	-2.32624e+08	-2.20067e+07	1.8052e+08	3.75261e+08	5.62515e+08	7.42567e+08	9.15695e+08	1.08216e+09	1.24223e+09	1.39614e+09	1.54413e+09	1.68643e+09	1.82326e+09	1.95482e+09	2.08132e+09	2.20296e+09	2.31992e+09	2.43238e+09	2.54052e+09	2.64449e+09	2.74447e+09	2.8406e+09	2.93304e+09	3.02192e+09	3.10738e+09	3.18955e+09	3.26856e+09	3.34454e+09	3.41759e+09	3.48783e+09	3.55538e+09	3.62032e+09	3.68276e+09	3.74281e+09	3.80054e+09
		14	3.36435e+09	-3.19004e+09	-2.94055e+09	-2.6622e+09	-2.37648e+09	-2.09326e+09	-1.81695e+09	-1.54939e+09	-1.29124e+09	-1.04261e+09	-8.03343e+08	-5.7319e+08	-3.51846e+08	-1.38996e+08	6.5678e+07	2.62484e+08	4.51723e+08	6.33684e+08	8.08647e+08	9.76881e+08	1.13864e+09	1.29419e+09	1.44375e+09	1.58755e+09	1.72583e+09	1.85879e+09	1.98663e+09	2.10956e+09	2.22776e+09	2.34141e+09	2.45069e+09	2.55577e+09	2.65681e+09	2.75396e+09	2.84737e+09	2.9372e+09	3.02356e+09	3.10661e+09	3.18646e+09	3.26324e+09	3.33707e+09	3.40805e+09	3.47631e+09	3.54194e+09	3.60505e+09	3.66573e+09	3.72408e+09
		15	3.44112e+09	-3.26474e+09	-3.0124e+09	-2.73096e+09	-2.44214e+09	-2.15589e+09	-1.87664e+09	-1.60626e+09	-1.34539e+09	-1.09415e+09	-8.5237e+08	-6.19801e+08	-3.96135e+08	-1.81051e+08	2.57696e+07	2.2464e+08	4.15864e+08	5.99734e+08	7.76532e+08	9.46531e+08	1.10999e+09	1.26716e+09	1.41829e+09	1.56361e+09	1.70334e+09	1.83769e+09	1.96687e+09	2.09109e+09	2.21053e+09	2.32537e+09	2.4358e+09	2.54198e+09	2.64408e+09	2.74225e+09	2.83664e+09	2.92741e+09	3.01468e+09	3.0986e+09	3.17929e+09	3.25687e+09	3.33147e+09	3.4032e+09	3.47218e+09	3.5385e+09	3.60227e+09	3.66358e+09	3.72254e+09
		16	3.62428e+09	-3.44581e+09	-3.19062e+09	-2.90609e+09	-2.61417e+09	-2.32489e+09	-2.04271e+09	-1.7695e+09	-1.50592e+09	-1.25206e+09	-1.00777e+09	-7.72786e+08	-5.46797e+08	-3.2948e+08	-1.20512e+08	8.04228e+07	2.73632e+08	4.5941e+08	6.38044e+08	8.09807e+08	9.74964e+08	1.13377e+09	1.28647e+09	1.43329e+09	1.57447e+09	1.71022e+09	1.84074e+09	1.96625e+09	2.08693e+09	2.20296e+09	2.31454e+09	2.42182e+09	2.52498e+09	2.62417e+09	2.71954e+09	2.81125e+09	2.89943e+09	2.98421e+09	3.06574e+09	3.14413e+09	3.21951e+09	3.29198e+09	3.36167e+09	3.42868e+09	3.49311e+09	3.55506e+09	3.61464e+09
		17	3.82594e+09	-3.64539e+09	-3.38734e+09	-3.09973e+09	-2.8047e+09	-2.51239e+09	-2.22728e+09	-1.95124e+09	-1.68494e+09	-1.42847e+09	-1.18167e+09	-9.44265e+08	-7.15954e+08	-4.96404e+08	-2.85289e+08	-8.22896e+07	1.12904e+08	3.00591e+08	4.8106e+08	6.54589e+08	8.21443e+08	9.81879e+08	1.13615e+09	1.28448e+09	1.42711e+09	1.56425e+09	1.69611e+09	1.82291e+09	1.94483e+09	2.06206e+09	2.17478e+09	2.28316e+09	2.38738e+09	2.48759e+09	2.58394e+09	2.67659e+09	2.76568e+09	2.85133e+09	2.9337e+09	3.01289e+09	3.08904e+09	3.16227e+09	3.23267e+09	3.30037e+09	3.36546e+09	3.42805e+09	3.48823e+09
		18	4.78612e+09	-4.60349e+09	-4.34258e+09	-4.05188e+09	-3.75375e+09	-3.45841e+09	-3.17036e+09	-2.8915e+09	-2.62248e+09	-2.3634e+09	-2.11408e+09	-1.87427e+09	-1.64363e+09	-1.42185e+09	-1.20859e+09	-1.00352e+09	-8.06345e+08	-6.16749e+08	-4.34445e+08	-2.59152e+08	-9.06012e+07	7.14669e+07	2.27302e+08	3.77143e+08	5.21221e+08	6.59758e+08	7.92966e+08	9.21051e+08	1.04421e+09	1.16263e+09	1.2765e+09	1.38599e+09	1.49126e+09	1.59249e+09	1.68982e+09	1.78341e+09	1.8734e+09	1.95993e+09	2.04314e+09	2.12314e+09	2.20006e+09	2.27403e+09	2.34515e+09	2.41353e+09	2.47929e+09	2.54251e+09	2.60331e+09
		19	5.99237e+09	-5.80764e+09	-5.54388e+09	-5.25009e+09	-4.94886e+09	-4.65048e+09	-4.3595e+09	-4.07782e+09	-3.80608e+09	-3.54438e+09	-3.29255e+09	-3.05032e+09	-2.81737e+09	-2.59335e+09	-2.37794e+09	-2.17081e+09	-1.97165e+09	-1.78014e+09	-1.596e+09	-1.41895e+09	-1.2487e+09	-1.085e+09	-9.27595e+08	-7.76246e+08	-6.30717e+08	-4.90786e+08	-3.56237e+08	-2.26862e+08	-1.02464e+08	1.71499e+07	1.32163e+08	2.42753e+08	3.49089e+08	4.51335e+08	5.49649e+08	6.44182e+08	7.35079e+08	8.22479e+08	9.06518e+08	9.87325e+08	1.06502e+09	1.13973e+09	1.21157e+09	1.28065e+09	1.34706e+09	1.41093e+09	1.47233e+09
		20	7.81468e+09	-7.62787e+09	-7.36124e+09	-7.06436e+09	-6.76003e+09	-6.45862e+09	-6.16471e+09	-5.8802e+09	-5.60574e+09	-5.34143e+09	-5.08709e+09	-4.84244e+09	-4.60717e+09	-4.38092e+09	-4.16336e+09	-3.95417e+09	-3.75302e+09	-3.5596e+09	-3.37363e+09	-3.19481e+09	-3.02286e+09	-2.85753e+09	-2.69856e+09	-2.5457e+09	-2.39872e+09	-2.2574e+09	-2.12151e+09	-1.99084e+09	-1.8652e+09	-1.7444e+09	-1.62824e+09	-1.51655e+09	-1.40915e+09	-1.30589e+09	-1.20659e+09	-1.11112e+09	-1.01931e+09	-9.31042e+08	-8.46166e+08	-7.64553e+08	-6.8608e+08	-6.10625e+08	-5.38072e+08	-4.6831e+08	-4.0123e+08	-3.36731e+08	-2.74713e+08
								1	0	0	0.5	1	1	1	1	1	1	1	1	1	1	1	1	1	1
								2	0	0	0	0.5	1	1	1	1	1	1	1	1	1	1	1	1	1
								3	0	0	0	0.5	1	1	1	1	1	1	1	1	1	1	1	1	1
								4	0	0	0	0.5	0.5	1	1	1	1	1	1	1	1	1	1	1	1
								5	0	0	0	0	0.5	1	1	1	1	1	1	1	1	1	1	1	1
								6	0	0	0	0	0.5	1	1	1	1	1	1	1	1	1	1	1	1
								7	0	0	0	0	0.5	0.5	1	1	1	1	1	1	1	1	1	1	1
								8	0	0	0	0	0	0.5	1	1	1	1	1	1	1	1	1	1	1
								9	0	0	0	0	0	0.5	0.5	1	1	1	1	1	1	1	1	1	1
								10	0	0	0	0	0	0	0.5	1	1	1	1	1	1	1	1	1	1
								11	0	0	0	0	0	0	0	0.5	1	1	1	1	1	1	1	1	1
								12	0	0	0	0	0	0	0	0.5	1	1	1	1	1	1	1	1	1
								13	0	0	0	0	0	0	0	0	0.5	1	1	1	1	1	1	1	1
								14	0	0	0	0	0	0	0	0	0.5	1	1	1	1	1	1	1	1
								15	0	0	0	0	0	0	0	0	0.5	1	1	1	1	1	1	1	1
								16	0	0	0	0	0	0	0	0	0	0.5	1	1	1	1	1	1	1
								17	0	0	0	0	0	0	0	0	0	0	0.5	1	1	1	1	1	1
								18	0	0	0	0	0	0	0	0	0	0	0	0	0	0	0	0.5	1
								19	0	0	0	0	0	0	0	0	0	0	0	0	0	0	0	0	0
								20	0	0	0	0	0	0	0	0	0	0	0	0	0	0	0	0	0
[truncated: 215 more columns]
